# Supplementary material for: Characterizing CO and NOy Sources and Relative Ambient Ratios in the Baltimore Area Using Ambient Measurements and Source Attribution Modeling
Source: PubMed Central journal article supplement (PMC9364951; doi:10.1002/2017jd027688), 2018-03-27
Supplement: NIHMS1725199-supplement-Supporting_Information_S1.pdf [file NIHMS1725199-supplement-Supporting_Information_S1.pdf]

**Characterizing sources of CO and NO<sub>x</sub> in the Baltimore area using ambient measurements from the DISCOVER-AQ field study and source attribution modeling**

Heather Simon<sup>1</sup>, Luke C. Valin<sup>2</sup>, Kirk R. Baker<sup>1</sup>, Barron H. Henderson<sup>1</sup>, James H. Crawford<sup>3</sup>, Sally E. Pusede<sup>4</sup>, James T. Kelly<sup>1</sup>, Kristen M. Foley<sup>2</sup>, R. Chris Owen<sup>1</sup>, Ronald C. Cohen<sup>5,6</sup>, Brian Timin<sup>1</sup>, Andrew J. Weinheimer<sup>7</sup>, Norm Possiel<sup>1</sup>, Chris Misennis<sup>1</sup>, Glenn S. Diskin<sup>3</sup>, and Alan Fried<sup>8</sup>

<sup>1</sup> Office of Air Quality Planning & Standards, US Environmental Protection Agency, RTP, NC

<sup>2</sup> National Exposure Research Laboratory, US Environmental Protection Agency, RTP, NC

<sup>3</sup> NASA Langley Research Center, Hampton, VA

<sup>4</sup> Department of Environmental Sciences, University of Virginia, Charlottesville, VA

<sup>5</sup> Department of Chemistry, University of California, Berkeley, Berkeley, CA

<sup>6</sup> Department of Earth and Planetary Science, University of California, Berkeley, Berkeley, CA

<sup>7</sup> National Center for Atmospheric Research, Boulder, CO

<sup>8</sup> Institute of Arctic and Alpine Research, University of Colorado, Boulder, CO

**Contents of this file**

Text S1 to S28

Figures S1 to S24

Tables S1 to S2

**Introduction**

This supplemental information document includes additional tables and figures to provide further details on methods and comparison of NO<sub>y</sub> and  $\sum$ NO<sub>y,i</sub> measurements, meteorological conditions during the field campaign, CMAQ model evaluation, CMAQ model-predicted source contributions for CO, NO<sub>2</sub>, and ozone,  $\Delta$ CO: $\Delta$ NO<sub>y</sub> ratios from all ambient and modeled regressions, and estimation instantaneous  $\Delta$ CO: $\Delta$ NO<sub>y</sub> ratios.

**Text S1. Description of measurement methods and comparison of NO<sub>y</sub> and  $\sum$ NO<sub>y,i</sub> measurements**

CO was measured on the NASA P-3B aircraft by the DACOM (Differential Absorption CO Measurements) instrument (Sachse, et al., 1987). Ambient air was supplied to the instrument via a Rosemont probe inlet and an

33 inline compressor at a nominal flowrate of 5 slpm. Measurements of CO (as well as CH<sub>4</sub> and N<sub>2</sub>O) are made  
34 using a wavelength-modulated mid-infrared diode laser which is passed through the measurement volume in a  
35 reduced-pressure astigmatic Herriott multipass cell. Nominal temporal response of the instrument is 1 Hz, with  
36 1% precision. Calibration gases, assayed by NOAA/ESRL, are introduced into the system periodically to maintain  
37 accuracy of the measurements at 2%.

38 Formaldehyde (CH<sub>2</sub>O) was measured on the NASA P3B aircraft using the DFGAS (Difference Frequency  
39 Generation Absorption Spectrometer) instrument, comprehensive details for which can be found in Fried et al  
40 (2016) and references therein. The measurement principle is similar to DACOM, but the DFGAS  
41 instrument employed a more sophisticated mid-IR laser source based upon difference frequency mixing  
42 of two near-IR lasers. As discussed, DFGAS provided CH<sub>2</sub>O data with 1–2 s time resolution with limits  
43 of detection (1 $\sigma$  LOD) in the 47 to 66 pptv range, with most values falling the 50 – 60 pptv range at 1  
44 second time resolution. The 1 minute LOD improved to around 20 pptv, and the estimated accuracy in  
45 all cases is ~ 4%.

46 NO, NO<sub>2</sub>, and NO<sub>y</sub>, and O<sub>3</sub> were measured with the NCAR 4-channel chemiluminescence instrument on board  
47 the P3B aircraft. For the NO channel, reagent O<sub>3</sub> is generated and mixed with the sample flow resulting in the  
48 chemiluminescent reaction that creates excited NO<sub>2</sub> molecules in proportion to ambient NO. The resulting  
49 photons are counted with a dry-ice-cooled photomultiplier tube. NO<sub>2</sub> is measured by converting a large fraction  
50 of the NO<sub>2</sub> to NO in a photolytic converter in a separate sample flow, followed by detection as NO. The signal  
51 due to ambient NO is subtracted and an adjustment is made for the sub-unity conversion efficiency to NO. NO<sub>y</sub>  
52 is measured in a third sample flow by catalytically converting NO<sub>y</sub> species to NO in a gold-tube converter heated  
53 to 300 C. The sensitivity of all channels to NO is measured periodically during flight by adding a small flow  
54 from a calibration standard with a known mixing ratio of NO in N<sub>2</sub>. The NO<sub>2</sub> conversion efficiencies of the NO<sub>2</sub>  
55 and NO<sub>y</sub> converters are also measured as part of the calibration sequence by converting a large, measured fraction  
56 of the calibration NO to NO<sub>2</sub> by reaction with O<sub>3</sub> prior to addition to the sample flow. Other than for periodic  
57 sensitivity, zero, and artifact determinations, data are recorded continuously and reported at 1 s with nominal  
58 uncertainty of 10% for NO measurements, 15% for NO<sub>2</sub>, 20% for NO<sub>y</sub> and 5% for O<sub>3</sub>.

59 NO<sub>2</sub> was also measured by laser-induced fluorescence (LIF) (Thornton et al., 1999). This instrument uses a Q-  
60 switched, frequency doubled Nd<sup>3+</sup>:YAG laser to pump a tunable dye laser, which is etalon-tuned between a  
61 specific 585 nm rovibronic NO<sub>2</sub> feature and the background continuum absorption. The resulting red-shifted  
62 photons are collected with a photomultiplier tube using time-gated counting. LIF data are selective for NO<sub>2</sub> and  
63 accurate to  $\pm 5\%$ , with the system calibrated at least every 30 min in flight with an NO<sub>2</sub> reference added at the  
64 inlet. To observe the atmospheric products of NO<sub>x</sub>, thermal dissociation (TD) is coupled to LIF. Peroxy nitrates  
65 (PNs;  $\Sigma$ RO<sub>2</sub>NO<sub>2</sub>), alkyl nitrates (ANs;  $\Sigma$ RONO<sub>2</sub>), and nitric acid (HNO<sub>3</sub>) each dissociate into NO<sub>2</sub>, detected by  
66 LIF, and a companion radical at characteristic temperatures of greater than 220 °C, 380 °C, and 650 °C,  
67 respectively. Mixing ratios of each are then determined as the difference between heated channels. For example,  
68 ANs are measured as the difference between the 380 °C channel (ANs + PNs + NO<sub>2</sub>) and the 220°C channel (PNs  
69 + NO<sub>2</sub>). Accuracy for the higher oxide measurements includes terms for the completeness of dissociation to NO<sub>2</sub>  
70 and the efficiency of transmission through the inlet. Accuracy is estimated for this DISCOVER-AQ deployment  
71 according to Day et al. (2002) to be  $\pm 10\%$  for PNs and  $\pm 15\%$  for ANs and HNO<sub>3</sub>. HNO<sub>3</sub> measurements represent  
72 both gas-phase HNO<sub>3</sub> and aerosol-phase nitrate in particles smaller than PM<sub>2.5</sub> (Pusede et al., 2016). The TD-  
73 LIF instrument used here is a two-cell system. Data were collected at 4 Hz and averaged to 1 second, such that  
74 measurements were made in the following cycle: NO<sub>2</sub> and PNs (8 s), ANs (8 s), NO<sub>2</sub> + PNs (8 s), and HNO<sub>3</sub> (8  
75 s), with 6 off-line seconds between each species sampling period. In order to better characterize measurement  
76 uncertainty of NO<sub>y</sub> and  $\Sigma$ NO<sub>y</sub>,I, we compare these two measurements matched in space and time for  
77 measurements taken within the boundary layer on each flight day in Figure S1. While the best efforts were made

78 to match measurements in time, it should be noted that since  $\sum \text{NO}_y, \text{I}$  is calculated by summing  $\text{NO}_y$  components  
79 that were measured up to 2.5 minutes apart. In contrast the  $\text{NO}_y$  measurements were aggregated to 15 second  
80 averages. Therefore, the  $\sum \text{NO}_y, \text{I}$  values represent slightly longer time averages which may impact comparisons  
81 at times during the flight when  $\text{NO}_y$  is changing rapidly, such as during spirals. While the comparisons generally  
82 line up close to the 1:1 line in figure S1, there are flight to flight differences in these two measurement methods  
83 for  $\text{NO}_y$ . Measurements made on July 1, 2, 5, 16 and 20 generally fall slightly above the 1:1 line, meaning that  
84  $\sum \text{NO}_y, \text{I}$  was consistently higher than measured  $\text{NO}_y$  on those flights. Conversely, data points fall consistently  
85 below the 1:1 line on July 10, 11, 14, 21, 22, 26, 27, 28, and 29 meaning that  $\sum \text{NO}_y, \text{I}$  was consistently higher  
86 than  $\text{NO}_y$  on those flight days.

87

88

89

90

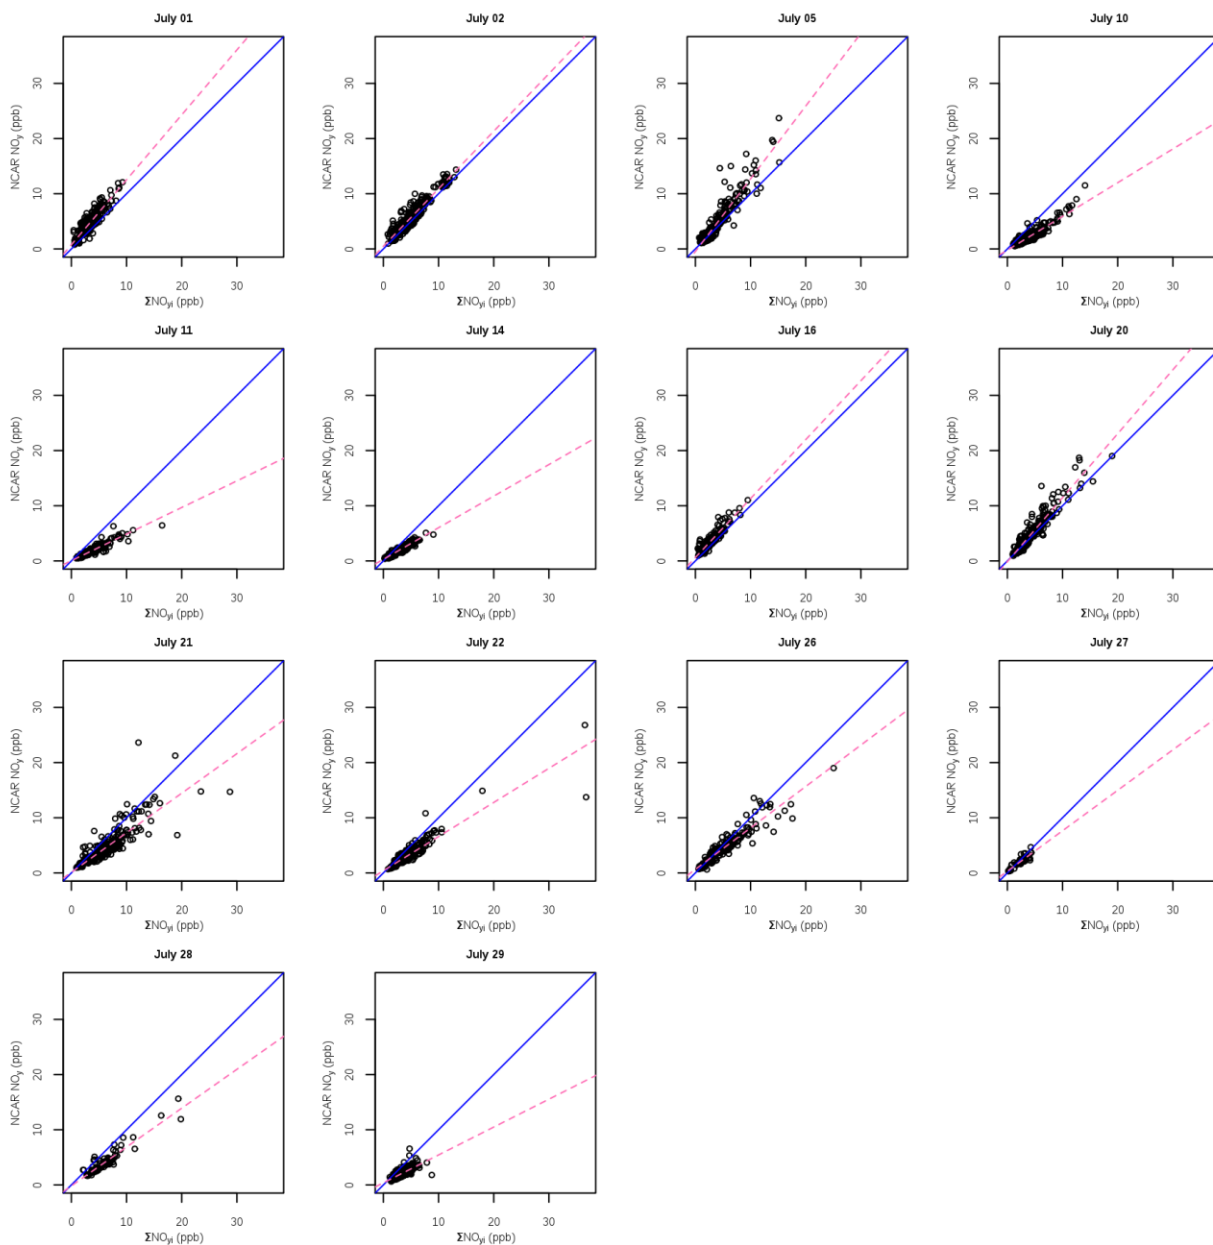

91

92

93 **Figure S1: comparison of NO<sub>y</sub> measured by NCAR with  $\sum$ NO<sub>y,i</sub> measurements on each P3B flight. 1:1**  
 94 **line shown in blue. Pink dashed line shows linear regression of NO<sub>y</sub> versus  $\sum$ NO<sub>y,i</sub>.**

95 Figure S2 shows a time series of the difference between measured  $\sum$ NO<sub>y,i</sub> and NO<sub>y</sub> on each flight. The  
 96 differences appear to periodically get larger and then smaller, with larger differences corresponding to higher  
 97 NO<sub>y</sub> mixing ratios which occur lower in the boundary layer (Figures S3 and S4). The periodic increases and  
 98 decreases in differences therefore correspond to ascents and descents of the P3B aircraft. On most days (with the  
 99 exception of Jul 20, 21, and 22) there is little visible progression of this difference over the course of a flight. In  
 100 other words, the difference between measurement methods does not get substantially larger or smaller as the flight  
 101 progresses indicating that these differences are not due to any failure to correct for instrument drift.

102 To further investigate the drivers of the differences between the two NO<sub>y</sub> measurement methods, we compare the  
103 difference between them with corresponding mixing ratios of each NO<sub>y</sub> components (Figures S3-S10). On flights  
104 where  $\sum \text{NO}_{y,i}$  was consistently larger than NO<sub>y</sub>, we see positive correlation between the differences in the  
105 measurements with total NO<sub>y</sub> and each NO<sub>y</sub> species (NO, NO<sub>2</sub>, HNO<sub>3</sub>, ANs, PNs). Conversely, on days where  
106  $\sum \text{NO}_{y,i}$  was consistently smaller than NO<sub>y</sub> there is a consistent negative correlation with total NO<sub>y</sub> and NO and  
107 NO<sub>2</sub>. However, on those days, there is little to no correlation between the measurement difference and the NO<sub>z</sub>  
108 species (HNO<sub>3</sub>, AN, PN). This suggests that on flights where  $\sum \text{NO}_{y,i}$  was greater than NO<sub>y</sub> the discrepancy  
109 does not appear to be due to any particular species, but on flights where  $\sum \text{NO}_{y,i}$  was less than NO<sub>y</sub> the discrepancy  
110 appears to be related to NO and NO<sub>2</sub>, but not related to aged NO<sub>z</sub> species.

111 Finally, in order to better understand how these measurement differences relate to estimated CMAQ model biases  
112 in NO<sub>y</sub>, we compare differences between  $\sum \text{NO}_{y,i}$  and NO<sub>y</sub> with model bias using NO<sub>y</sub> measurements (Figure  
113 S9) and model bias using  $\sum \text{NO}_{y,i}$  (Figure S10). The model bias has moderate correlation (or anti-correlation)  
114 (magnitude of  $r$  between 0.25 and 0.63) with measurement differences on 8 of the 14 flight days for each of the  
115 two NO<sub>y</sub> measurement methods, with very low correlation on the other 6 flight days. For days where  $\sum \text{NO}_{y,i}$   
116 was greater than NO<sub>y</sub>, comparing the modeled NO<sub>y</sub> with  $\sum \text{NO}_{y,i}$  generally improved model over-predictions  
117 seen when modeled NO<sub>y</sub> was compared with measured NO<sub>y</sub>. On those days, model mean bias ranged from -1.6  
118 ppb to 7.1 ppb when calculated with measured NO<sub>y</sub> and ranged from -2.3 ppb to 5.5 ppb when calculated with  
119  $\sum \text{NO}_{y,i}$ . on days where  $\sum \text{NO}_{y,i}$  was smaller than NO<sub>y</sub>, the impact of the NO<sub>y</sub> measurement method on model  
120 performance was mixed, although in general model NO<sub>y</sub> performance was better on those 5 days (-0.1 ppb to 2.6  
121 ppb).

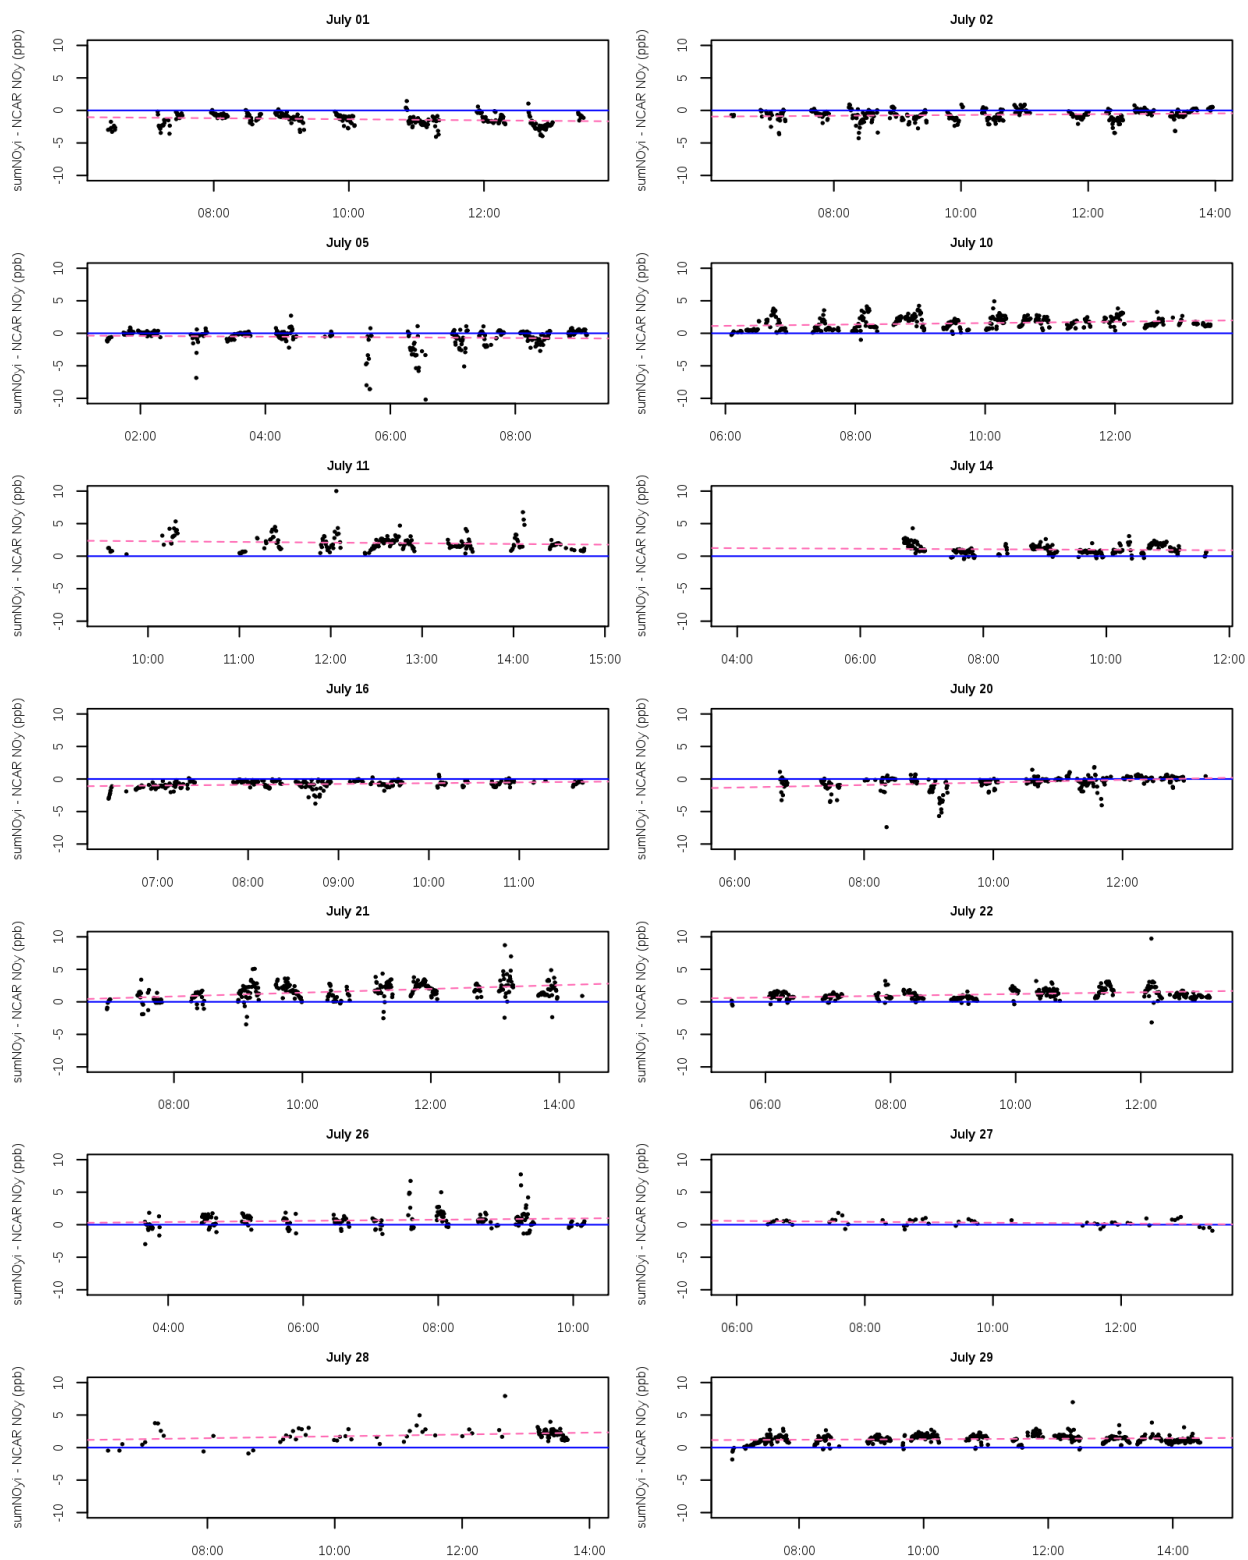

122

123 **Figure S2: Time series of differences between  $\sum \text{NOy},i$  and  $\text{NOy}$  measurements on each flight day. Blue line**  
 124 **shows zero difference. Pink dashed line shows the linear regression of this difference over time for each**  
 125 **flight.**

126

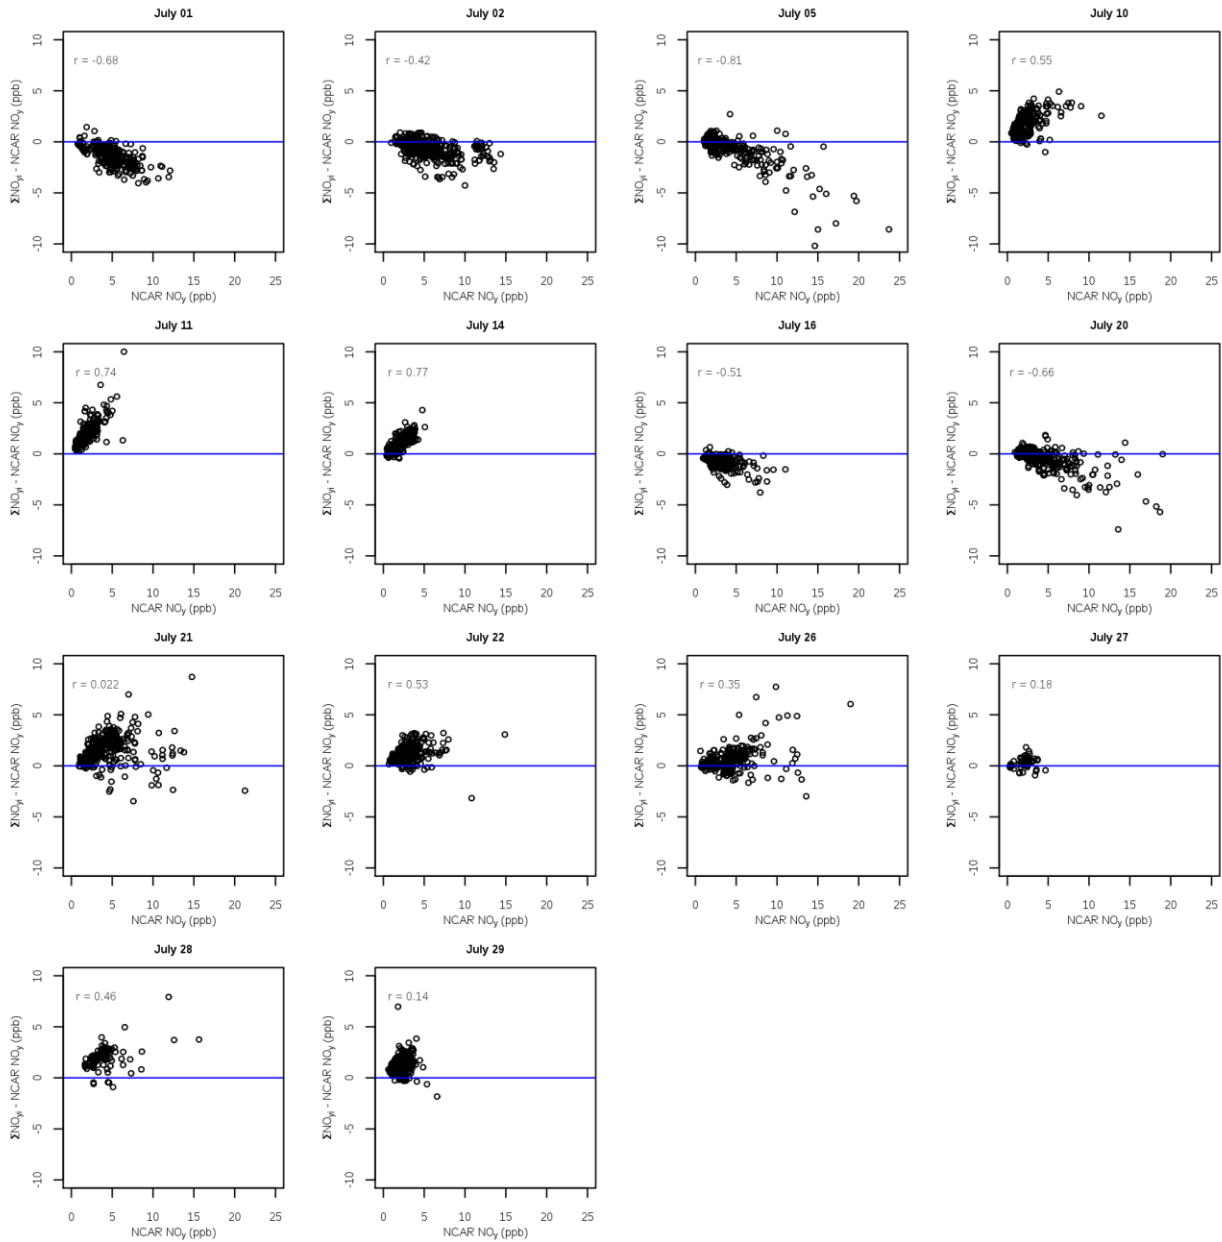

127

128 **Figure S3: Differences between  $\sum \text{NO}_{y,i}$  and  $\text{NO}_y$  compared to total measured  $\text{NO}_y$  on each flight day.**  
 129 **Blue lines indicate zero difference. Correlation values (  $r$  ) between the  $\text{NO}_y$  measurement differences and**  
 130 **total  $\text{NO}_y$  are given for each flight day.**

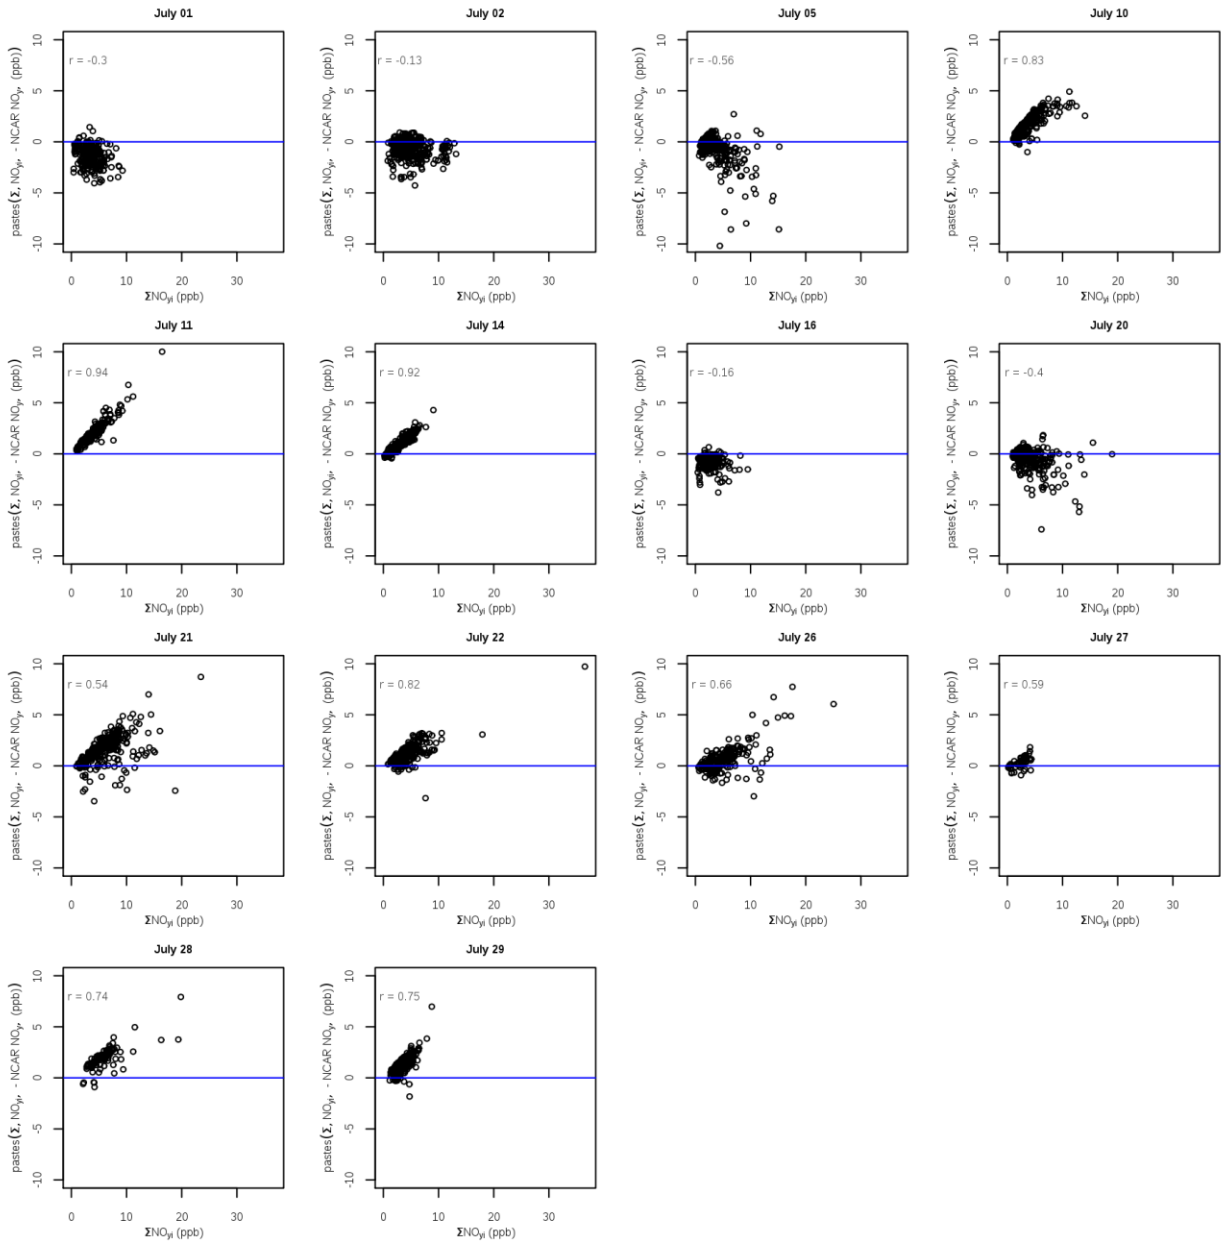

131

132 **Figure S4: Differences between  $\sum \text{NO}_{y,i}$  and  $\text{NO}_y$  compared to  $\sum \text{NO}_{y,i}$  on each flight day. Blue lines**  
 133 **indicate zero difference. Correlation values (  $r$  ) between the  $\text{NO}_y$  measurement differences and  $\sum \text{NO}_{y,i}$  are**  
 134 **given for each flight day.**



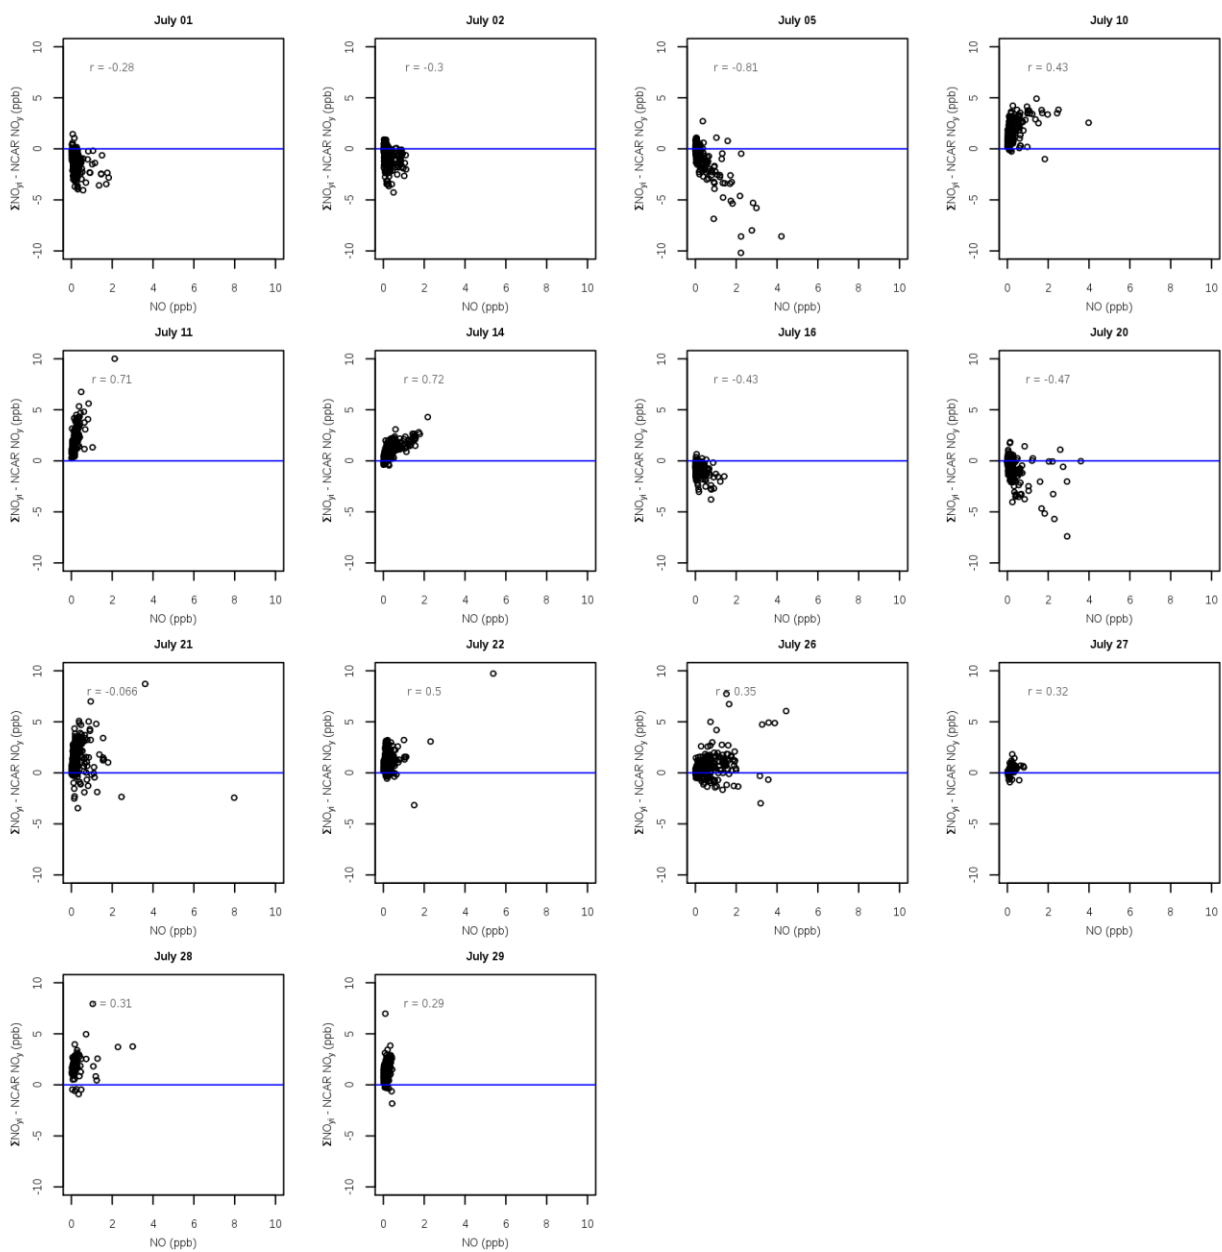

135

136 **Figure S5: Differences between  $\sum \text{NO}_{y,i}$  and  $\text{NO}_y$  compared to measured NO on each flight day. Blue lines**  
 137 **indicate zero difference. Correlation values (  $r$  ) between the  $\text{NO}_y$  measurement differences and NO are**  
 138 **given for each flight day.**

139

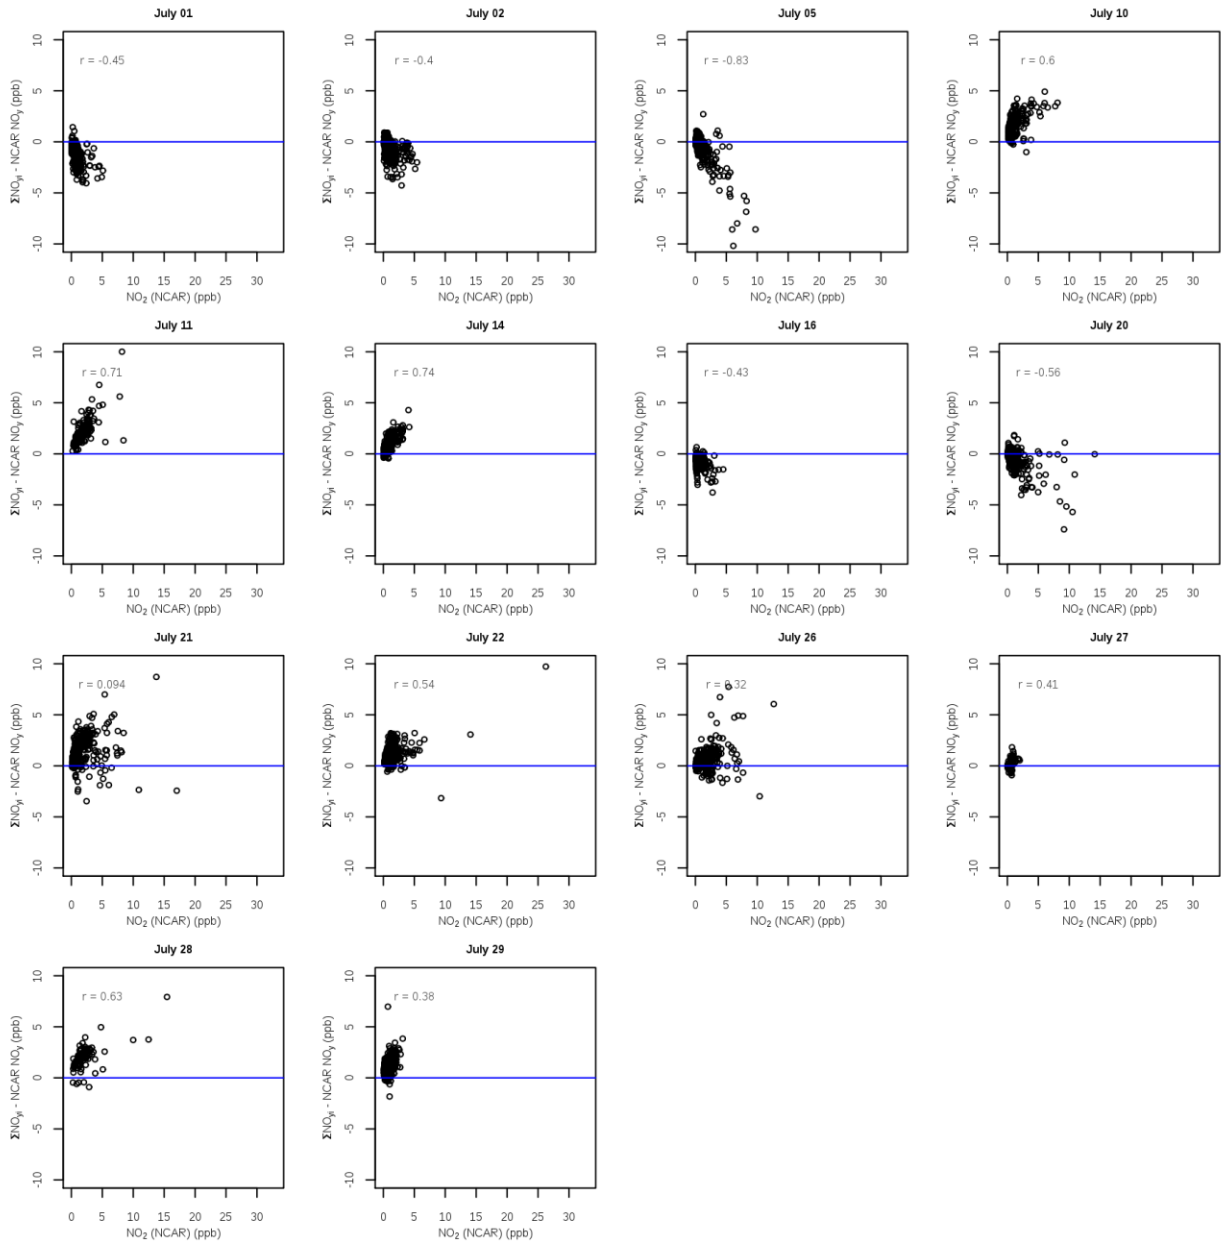

140

141 **Figure S6: Differences between  $\Sigma\text{NO}_{y,i}$  and  $\text{NO}_y$  compared to measured NCAR  $\text{NO}_2$  on each flight day.**  
 142 **Blue lines indicate zero difference. Correlation values ( r ) between the  $\text{NO}_y$  measurement differences and**  
 143 **NCAR measured  $\text{NO}_2$  are given for each flight day.**

144

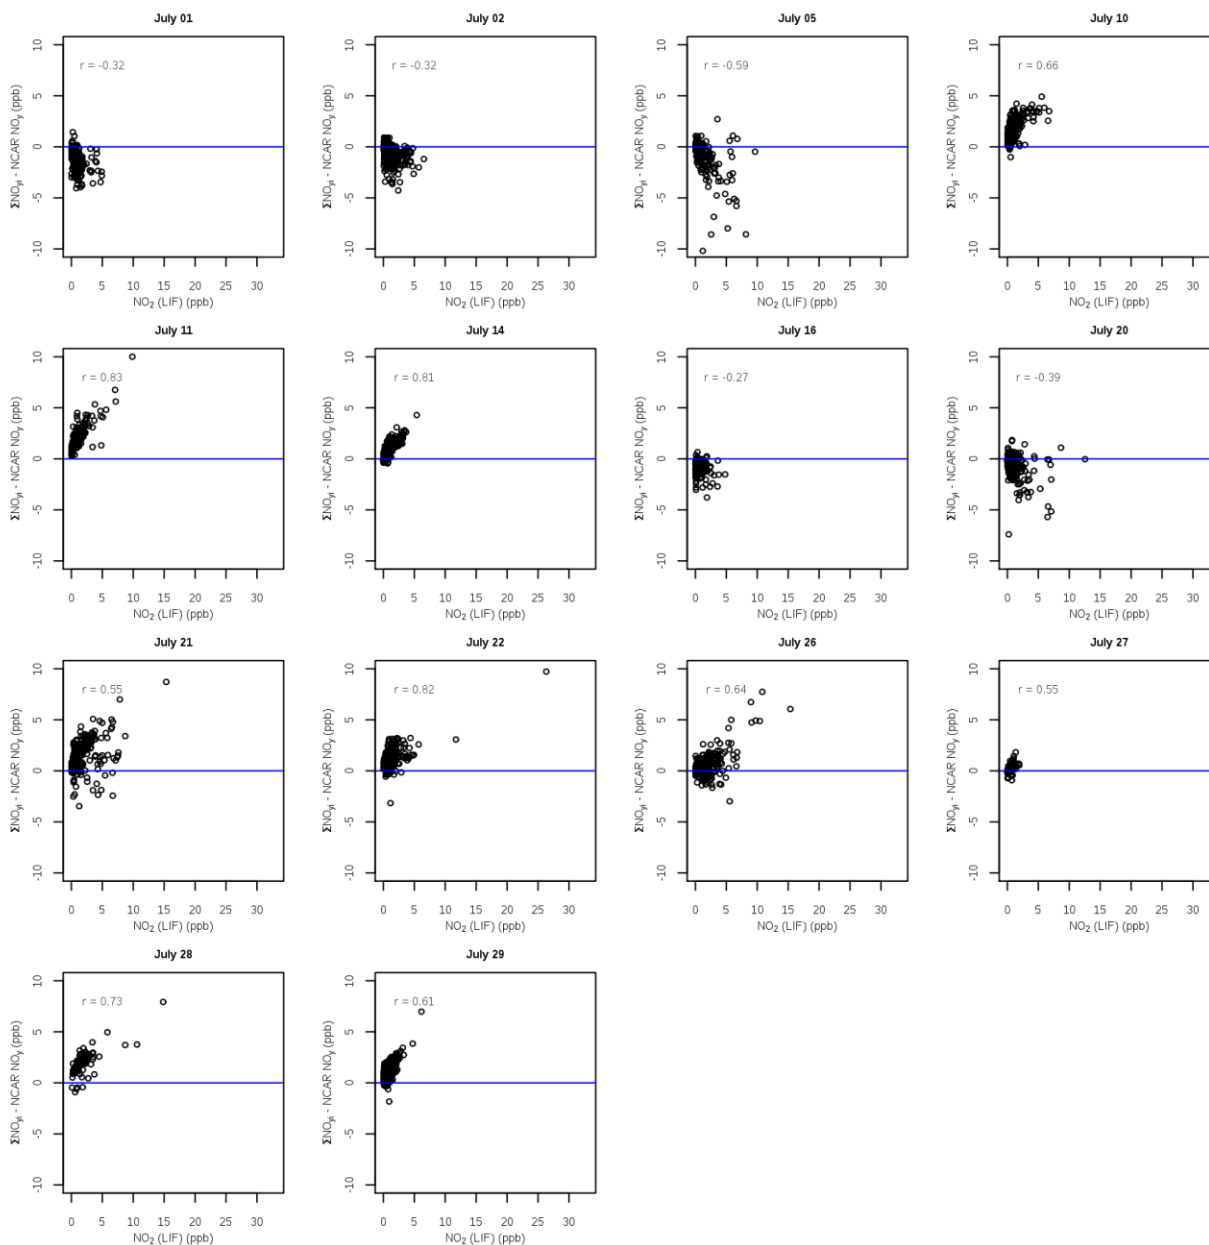

145

146 **Figure S7: Differences between  $\Sigma\text{NO}_{y,i}$  and  $\text{NO}_y$  compared to measured LIF  $\text{NO}_2$  on each flight day.**  
 147 **Blue lines indicate zero difference. Correlation values ( r ) between the  $\text{NO}_y$  measurement differences and**  
 148 **LIF measured  $\text{NO}_2$  are given for each flight day.**

149

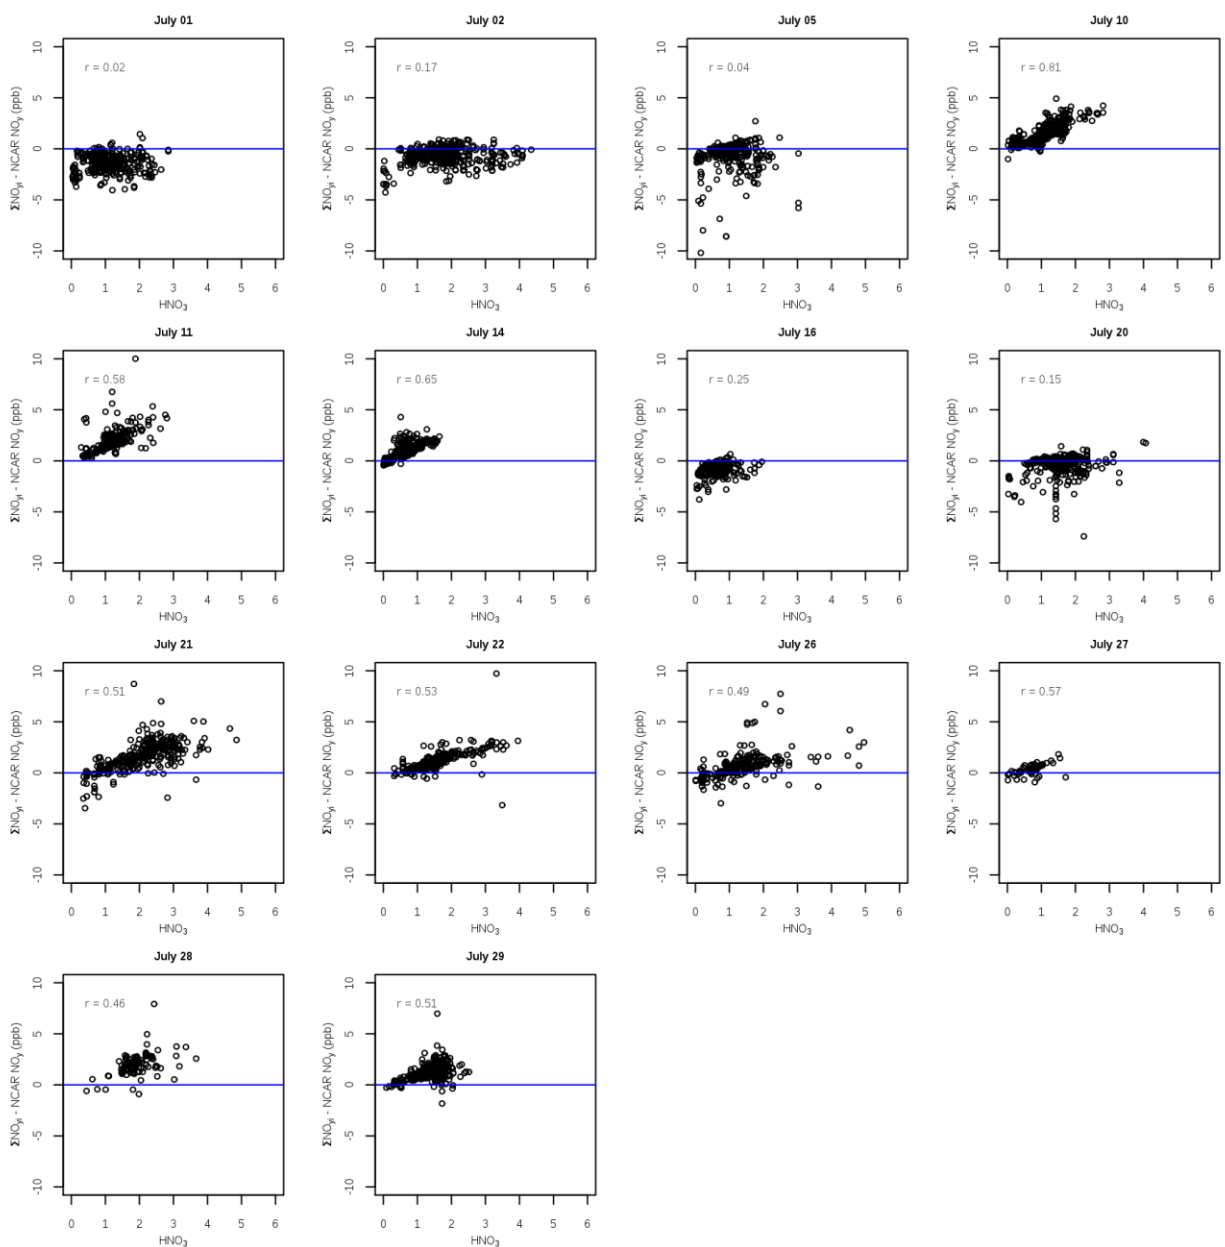

150

151 **Figure S8: Differences between  $\sum \text{NO}_{y,i}$  and  $\text{NO}_y$  compared to measured  $\text{HNO}_3$  on each flight day. Blue**  
 152 **lines indicate zero difference. Correlation values (  $r$  ) between the  $\text{NO}_y$  measurement differences and**  
 153  **$\text{HNO}_3$  are given for each flight day.**

154

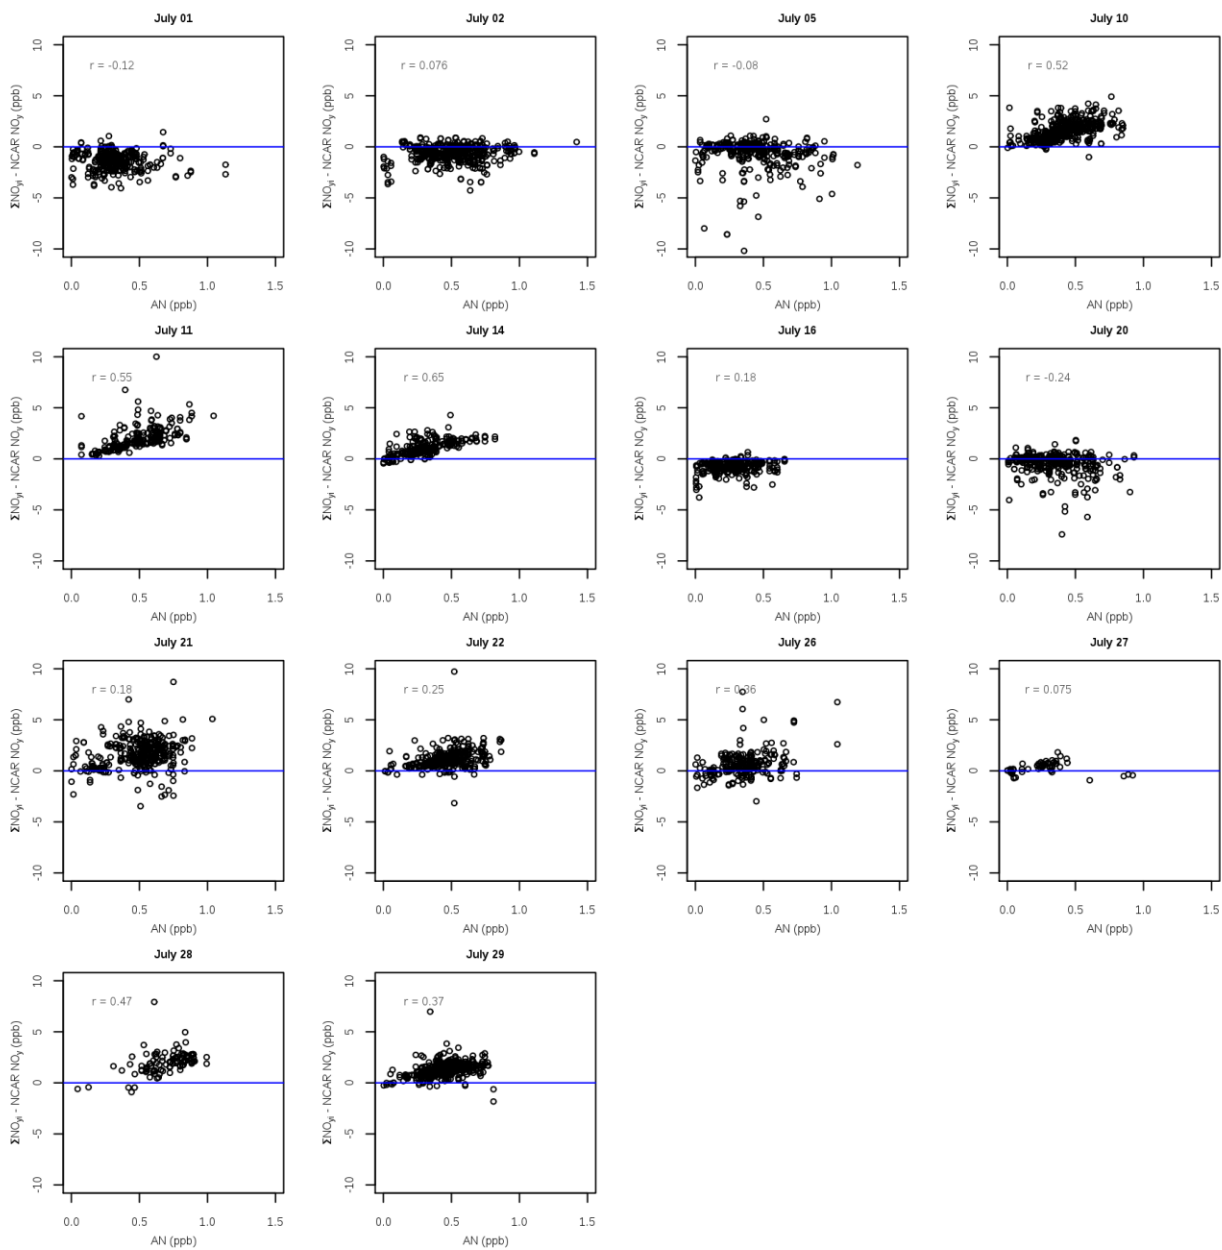

155

156 **Figure S9: Differences between  $\Sigma\text{NO}_{y,i}$  and  $\text{NO}_y$  compared to measured ANs on each flight day. Blue**  
 157 **lines indicate zero difference. Correlation values (  $r$  ) between the  $\text{NO}_y$  measurement differences and AN**  
 158 **are given for each flight day.**

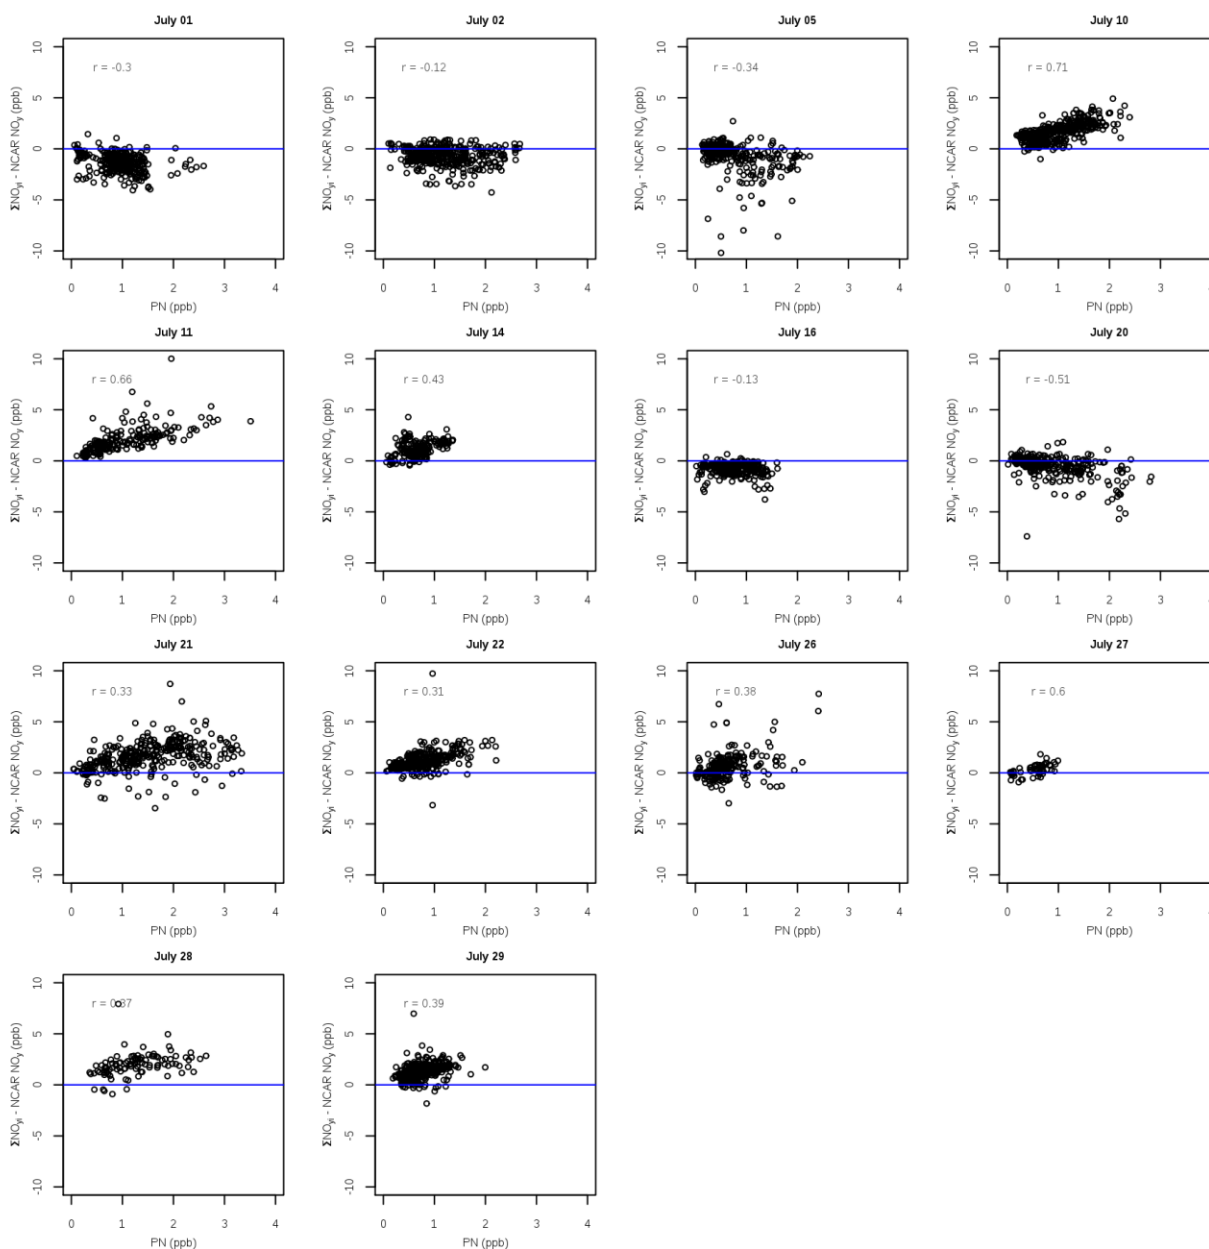

159

160 **Figure S10: Differences between  $\Sigma\text{NOy},i$  and  $\text{NOy}$  compared to measured PNs on each flight day. Blue**  
 161 **lines indicate zero difference. Correlation values (  $r$  ) between the  $\text{NOy}$  measurement differences and PN**  
 162 **are given for each flight day.**

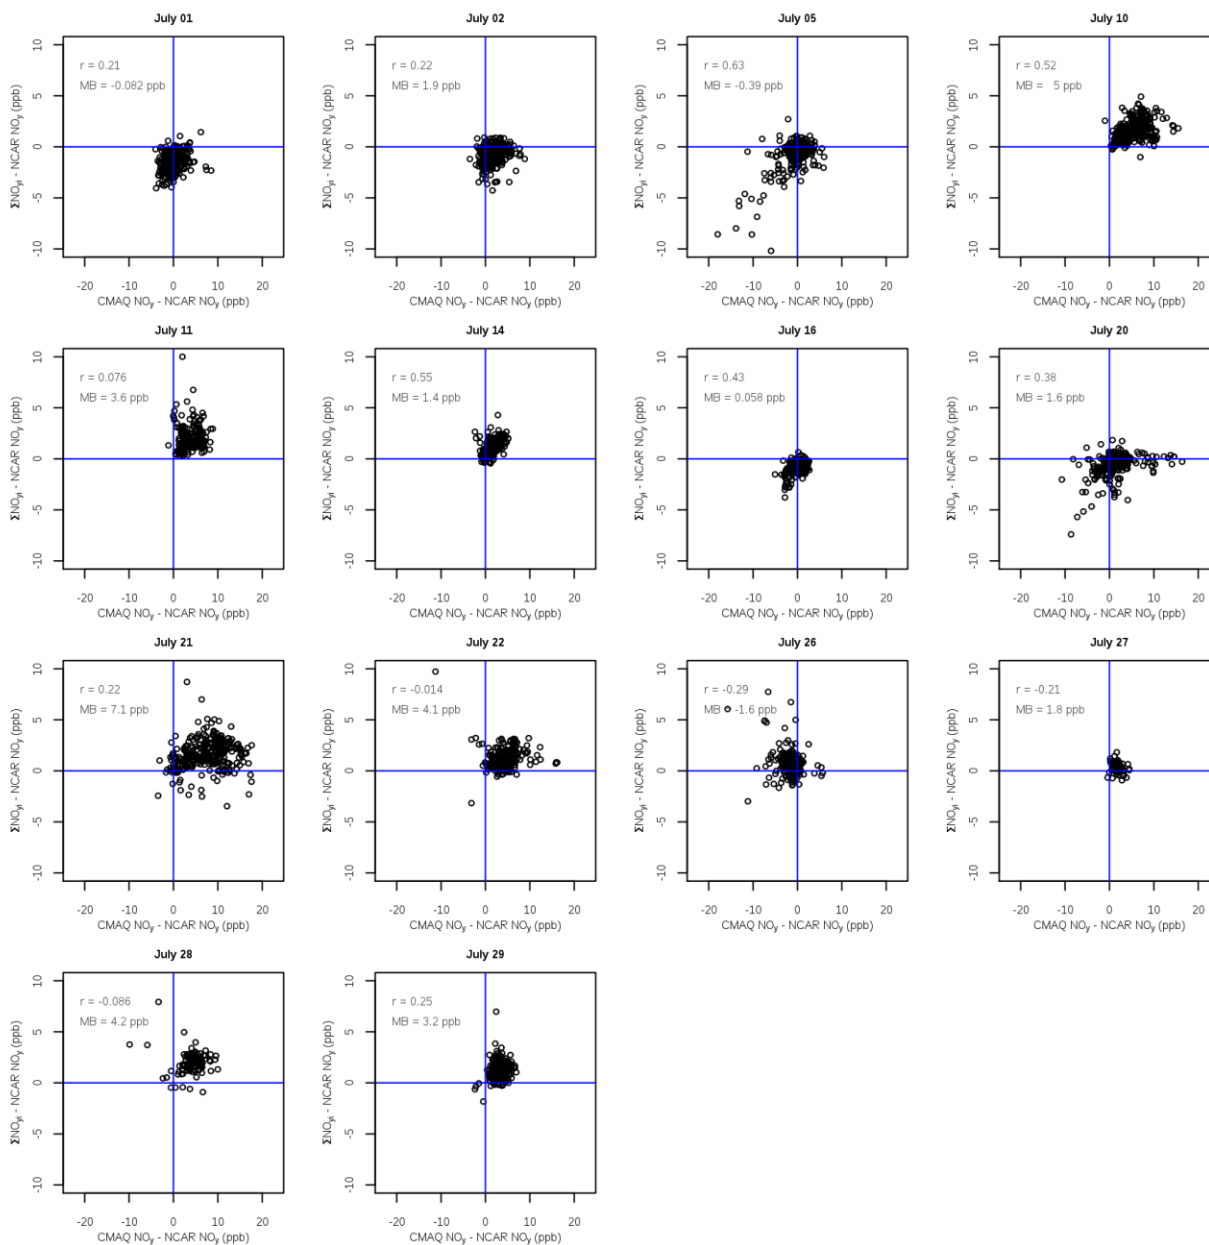

163

164 **Figure S11: Differences between  $\Sigma\text{NO}_{y,i}$  and  $\text{NO}_y$  compared to CMAQ model bias using  $\text{NO}_y$  on each**  
 165 **flight day. Blue lines indicate zero difference and zero CMAQ model bias. Correlation values (  $r$  ) between**  
 166 **the  $\text{NO}_y$  measurement differences and measured  $\text{NO}_y$  are given for each flight day. In addition, mean bias**  
 167 **(model  $\text{NO}_y$  – measured  $\text{NO}_y$ ) are also given for each flight day.**

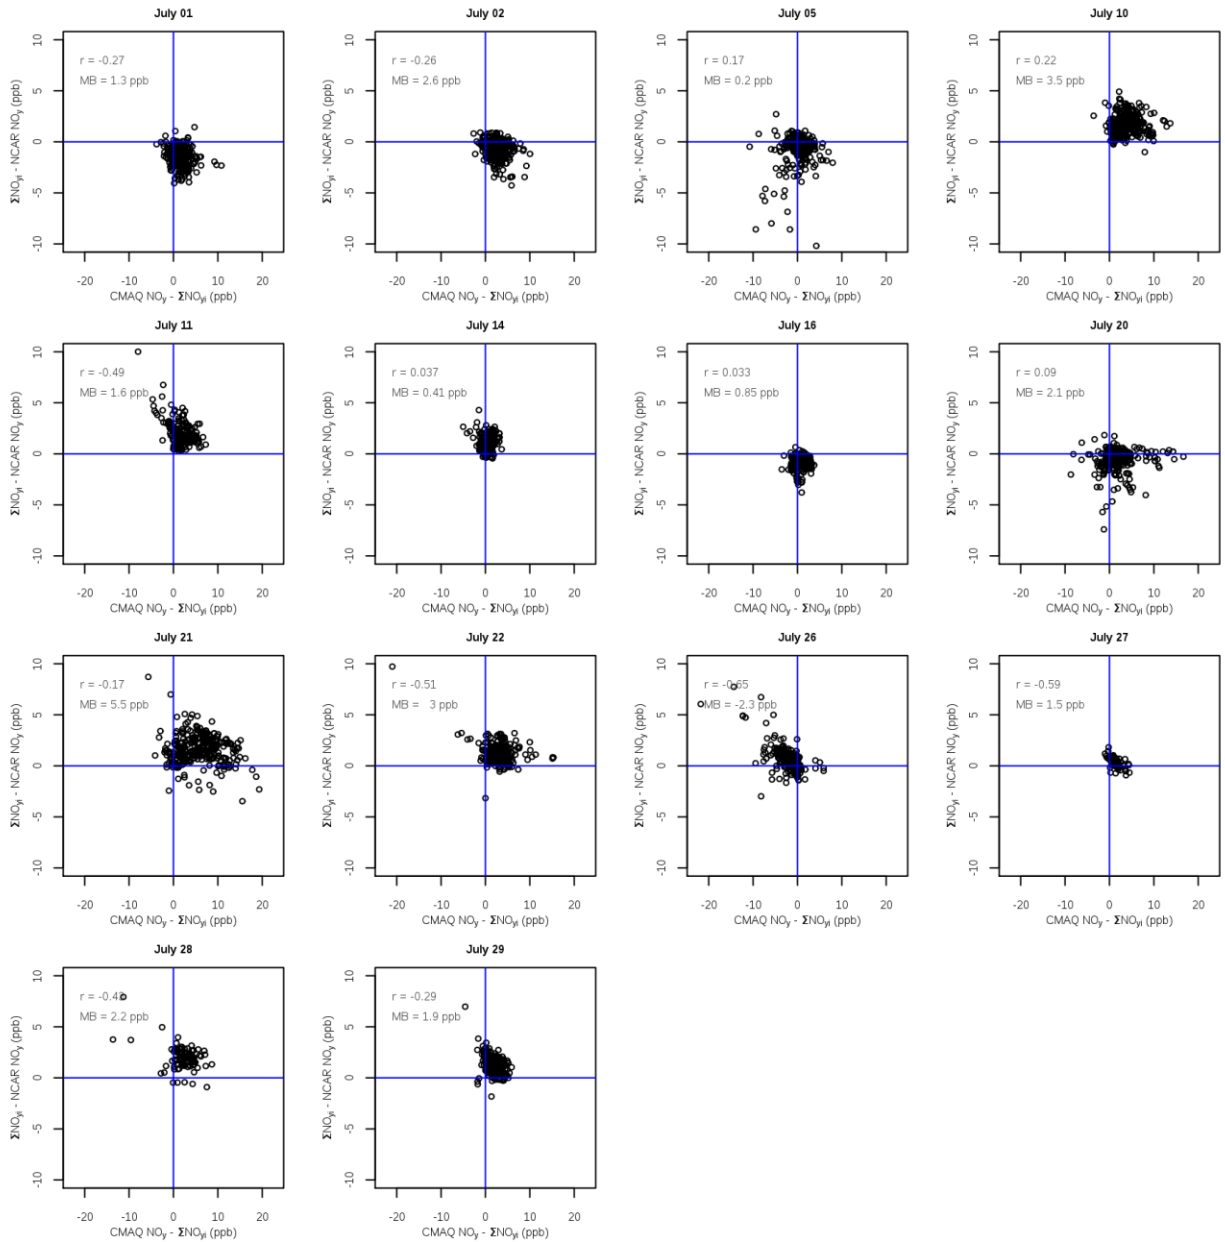

168

169 **Figure S12: Differences between  $\sum\text{NOy},i$  and  $\text{NOy}$  compared to CMAQ model bias using  $\sum\text{NOy},i$  on each**  
 170 **flight day. Blue lines indicate zero difference and zero CMAQ model bias. Correlation values ( r )**  
 171 **between the  $\text{NOy}$  measurement differences and  $\sum\text{NOy},i$  are given for each flight day. In addition, mean**  
 172 **bais (model  $\text{NOy}$  –  $\sum\text{NOy},i$ ) are also given for each flight day.**

173

174

175

176

177



178 **Section S2: Meteorological information**

179 **Table S1: Summary of July 2011 meteorological conditions in Baltimore, MD**

| Date      | Day | Max Temp (F) | Max RH (%) | Min Visibility (Miles) | Max Wind Speed (MPH) | Mean Wind Speed (MPH) | Precipitation (Inches) | Cloud Cover | Events* | Flight Day? |
|-----------|-----|--------------|------------|------------------------|----------------------|-----------------------|------------------------|-------------|---------|-------------|
| 6/30/2011 | Thu | 86           | 84         | 10                     | 15                   | 3                     | 0                      | 2           |         | N           |
| 7/1/2011  | Fri | 89           | 84         | 10                     | 12                   | 3                     | 0                      | 1           |         | Y           |
| 7/2/2011  | Sat | 93           | 90         | 10                     | 14                   | 3                     | 0                      | 3           |         | Y           |
| 7/3/2011  | Sun | 93           | 93         | 1                      | 28                   | 6                     | 0.55                   | 7           | R,T     | N           |
| 7/4/2011  | Mon | 89           | 93         | 9                      | 7                    | 3                     | T                      | 7           |         | N           |
| 7/5/2011  | Tue | 93           | 90         | 6                      | 12                   | 3                     | 0                      | 3           |         | Y           |
| 7/6/2011  | Wed | 89           | 93         | 5                      | 12                   | 4                     | T                      | 5           | R       | N           |
| 7/7/2011  | Thu | 95           | 100        | 2                      | 30                   | 5                     | 0.1                    | 3           | R,T     | N           |
| 7/8/2011  | Fri | 87           | 93         | 0                      | 22                   | 4                     | 0.83                   | 7           | F,R,T   | N           |
| 7/9/2011  | Sat | 90           | 97         | 5                      | 14                   | 5                     | 0                      | 3           |         | N           |
| 7/10/2011 | Sun | 90           | 84         | 7                      | 15                   | 3                     | 0                      | 2           |         | Y           |
| 7/11/2011 | Mon | 93           | 94         | 2                      | 31                   | 8                     | 0.17                   | 4           | R,T     | Y           |
| 7/12/2011 | Tue | 93           | 94         | 9                      | 17                   | 8                     | 0                      | 5           |         | N           |
| 7/13/2011 | Wed | 92           | 93         | 2                      | 15                   | 4                     | 0.26                   | 5           | R,T     | N           |
| 7/14/2011 | Thu | 83           | 68         | 10                     | 16                   | 6                     | 0                      | 3           |         | Y           |
| 7/15/2011 | Fri | 83           | 87         | 10                     | 13                   | 4                     | 0                      | 3           |         | N           |
| 7/16/2011 | Sat | 87           | 90         | 9                      | 15                   | 5                     | 0                      | 2           |         | Y           |
| 7/17/2011 | Sun | 91           | 78         | 10                     | 13                   | 5                     | 0                      | 3           |         | N           |
| 7/18/2011 | Mon | 95           | 90         | 9                      | 14                   | 6                     | 0                      | 4           |         | N           |
| 7/19/2011 | Tue | 95           | 85         | 1                      | 16                   | 4                     | 0.16                   | 7           | R,T     | N           |
| 7/20/2011 | Wed | 93           | 93         | 4                      | 10                   | 4                     | 0                      | 3           |         | Y           |
| 7/21/2011 | Thu | 100          | 94         | 2                      | 15                   | 5                     | 0                      | 2           | F       | Y           |
| 7/22/2011 | Fri | 106          | 85         | 5                      | 16                   | 5                     | 0                      | 3           |         | Y           |
| 7/23/2011 | Sat | 102          | 79         | 7                      | 15                   | 5                     | 0.06                   | 4           | R       | N           |
| 7/24/2011 | Sun | 98           | 85         | 6                      | 14                   | 7                     | 0                      | 5           |         | N           |
| 7/25/2011 | Mon | 91           | 94         | 1                      | 14                   | 4                     | 0.64                   | 6           | R,T     | N           |
| 7/26/2011 | Tue | 95           | 93         | 2                      | 14                   | 5                     | 0                      | 2           | F       | Y           |
| 7/27/2011 | Wed | 90           | 73         | 10                     | 15                   | 5                     | 0                      | 4           |         | Y           |
| 7/28/2011 | Thu | 91           | 84         | 10                     | 9                    | 3                     | T                      | 6           |         | Y           |
| 7/29/2011 | Fri | 101          | 85         | 5                      | 21                   | 6                     | 0                      | 3           |         | Y           |
| 7/30/2011 | Sat | 96           | 82         | 9                      | 16                   | 5                     | 0                      | 4           |         | N           |

180 \*Rain (R), Thunderstorms (T), Fog (F)

181

182 Section S3: Additional Model Performance Analysis

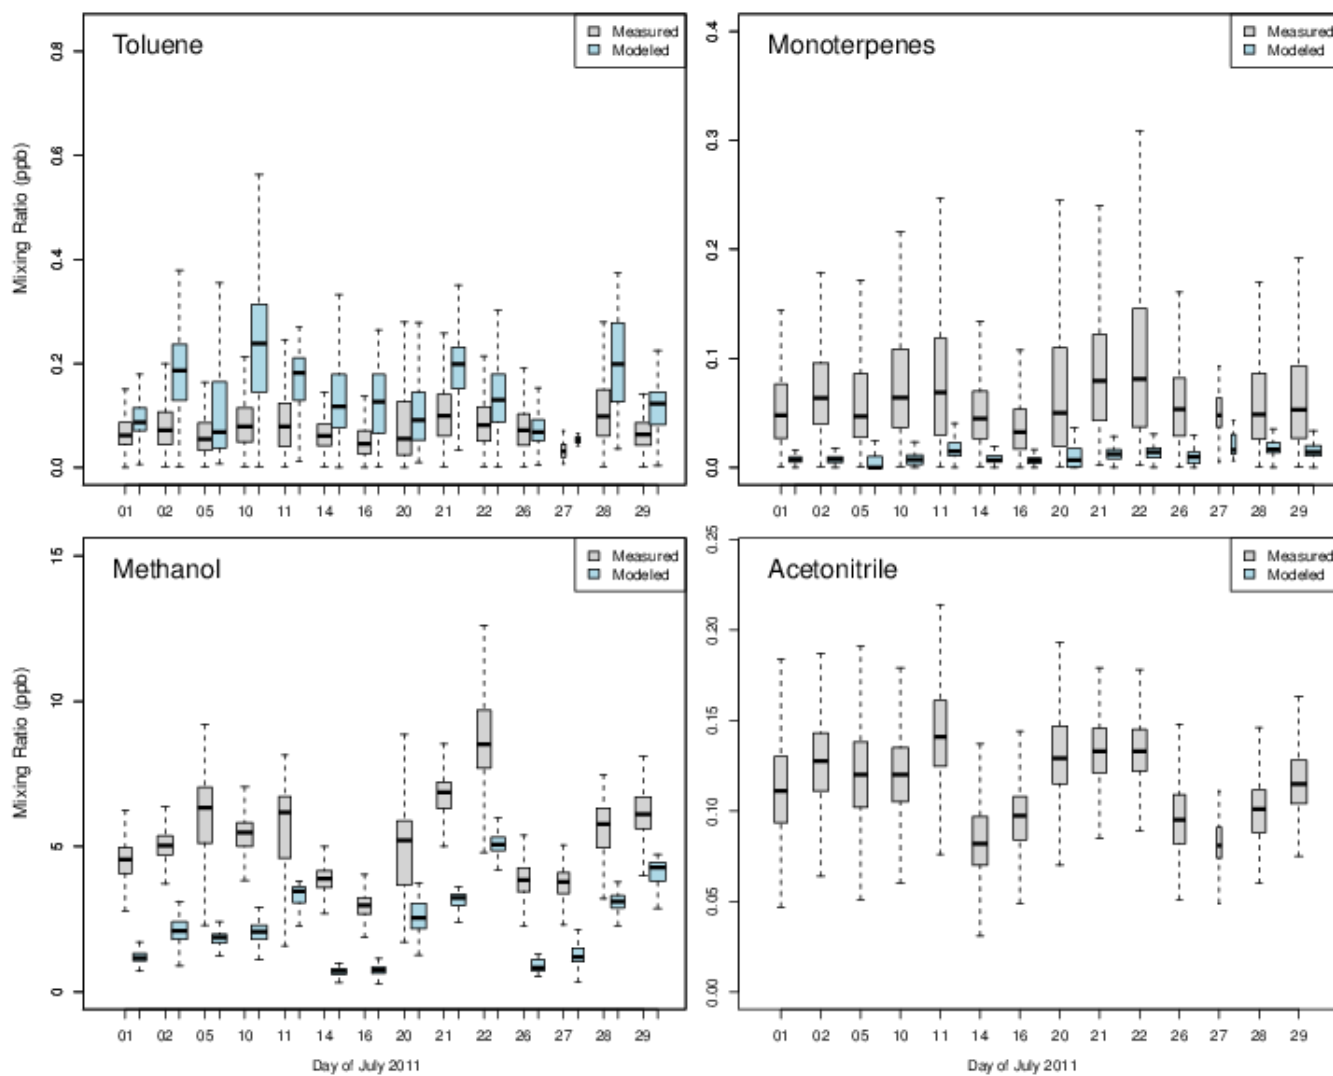

183

184 Figure S13. Modeled and observed mixing ratios of organic species (toluene, methanol, monoterpenes,  
185 acetonitrile) from the P3B aircraft.

186

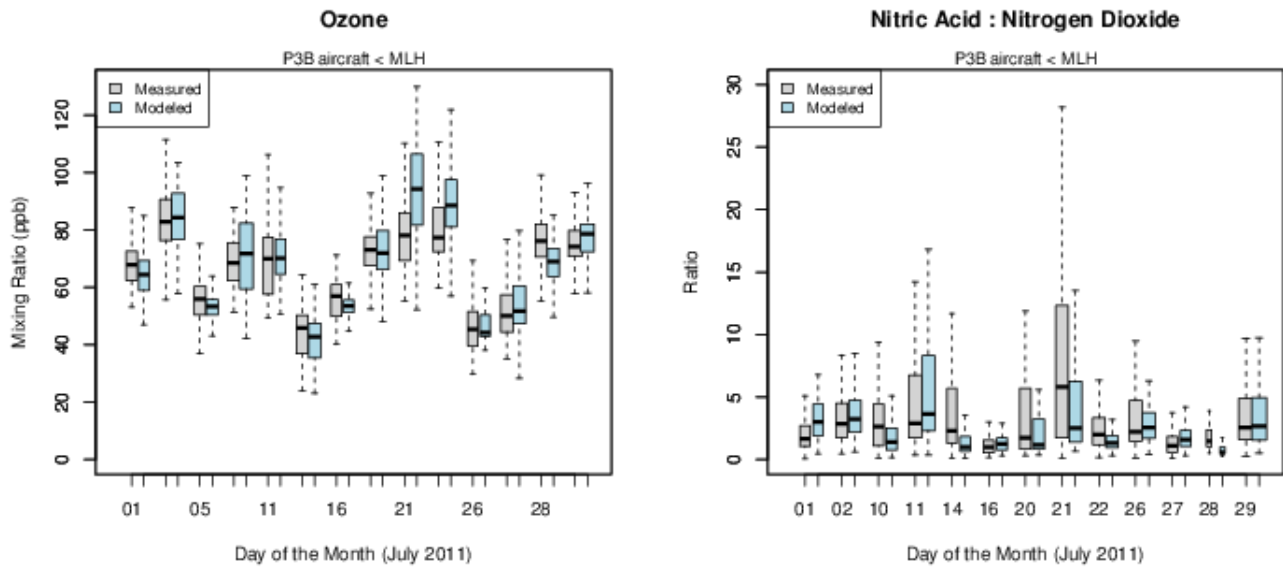

187

188 **Figure S14. Measured and modeled mixing ratios of Ozone and HNO<sub>3</sub>:NO<sub>2</sub> from the P3B aircraft.**

189 The modeling system does well at capturing the magnitude and spatial variability in O<sub>3</sub> over the Chesapeake Bay  
 190 compared to ship based measurements from this field study (Figure S15). Nitrogen oxide peak measurements are  
 191 captured by the model but the modeling system consistently had high predictions even where measurements  
 192 showed low values. Source apportionment modeling indicates fairly similar contribution from the commercial  
 193 marine sector, local to regional anthropogenic sources, and biogenics to O<sub>3</sub> over the Chesapeake Bay. However,  
 194 the commercial marine sector tended to contribute most to NO, especially nearer to the Port of Baltimore. The  
 195 model does estimate notable local to regional anthropogenic source contribution to NO in the Chesapeake Bay on  
 196 certain days when meteorological conditions are favorable.

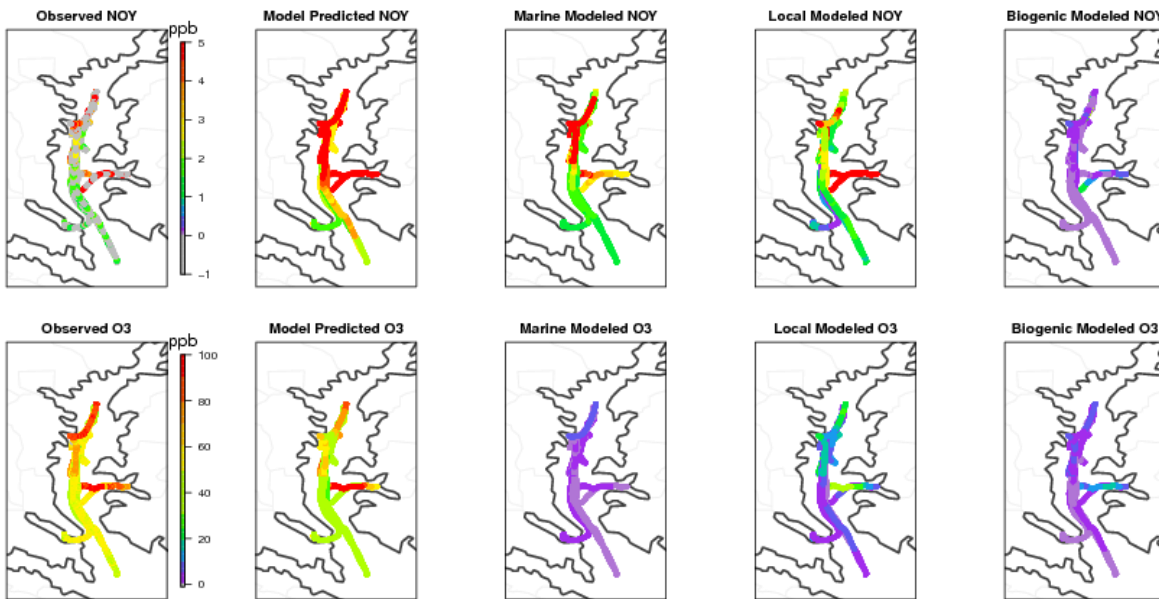

197

198 **Figures S15: Observed and modeled O<sub>3</sub> and NO from ship measurements taken from the Chesapeake Bay**  
 199 **on July 11-18 and July 20, 2011.**

200

201

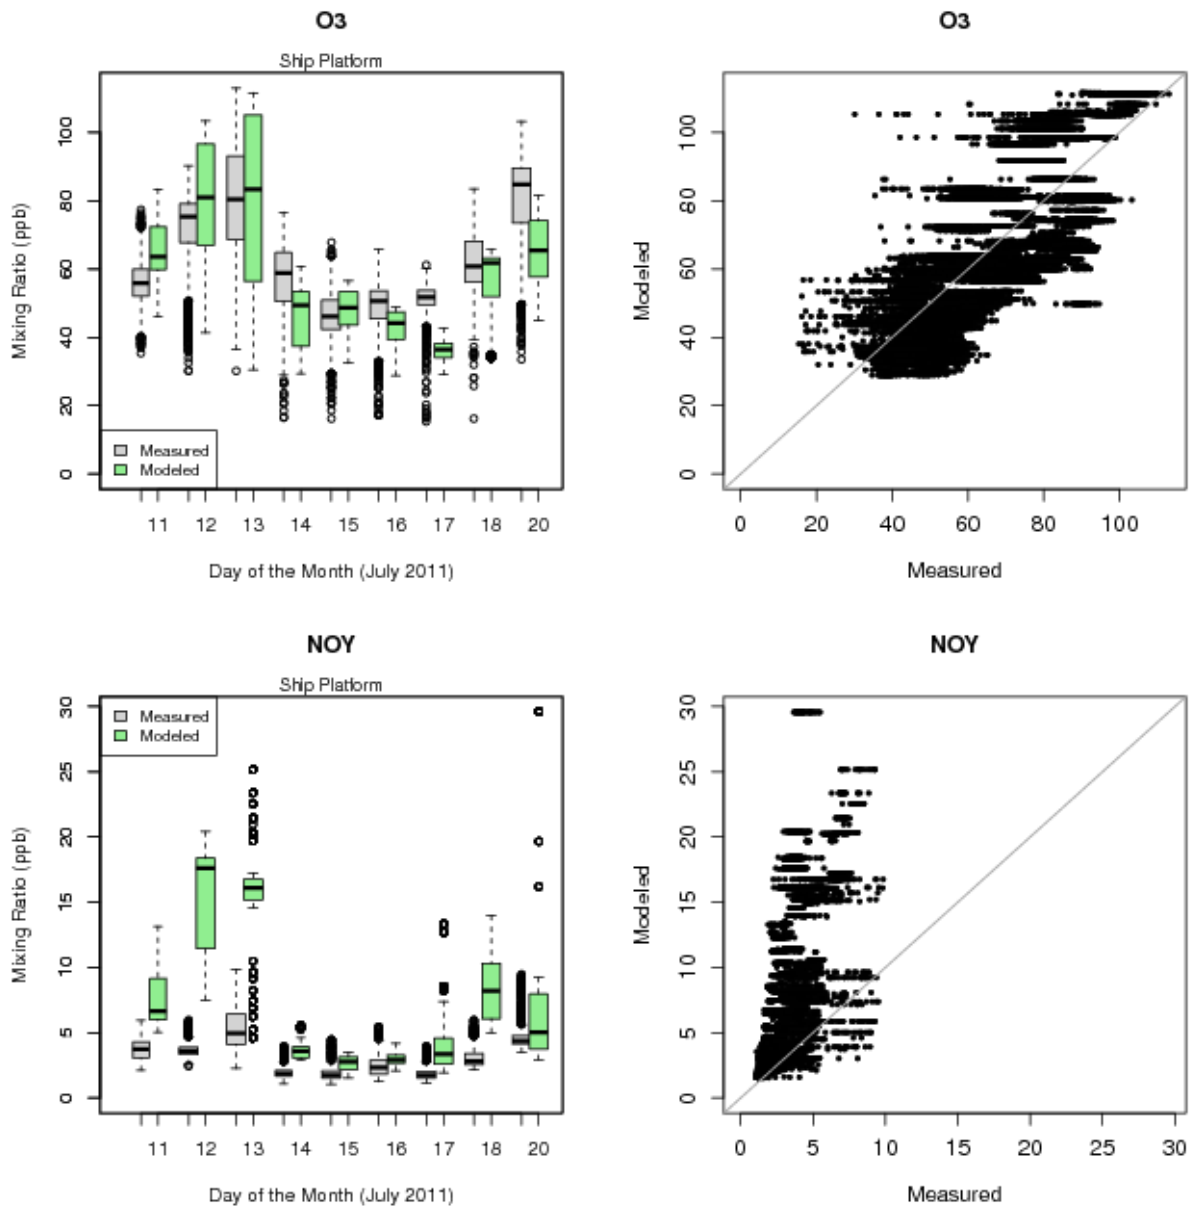

202

203

204

**Figure S16: Distribution of O<sub>3</sub> and NO<sub>y</sub> from ship measurements (and paired model predictions) taken from the Chesapeake Bay on July 11-18 and July 20, 2011.**

205

206

207

208

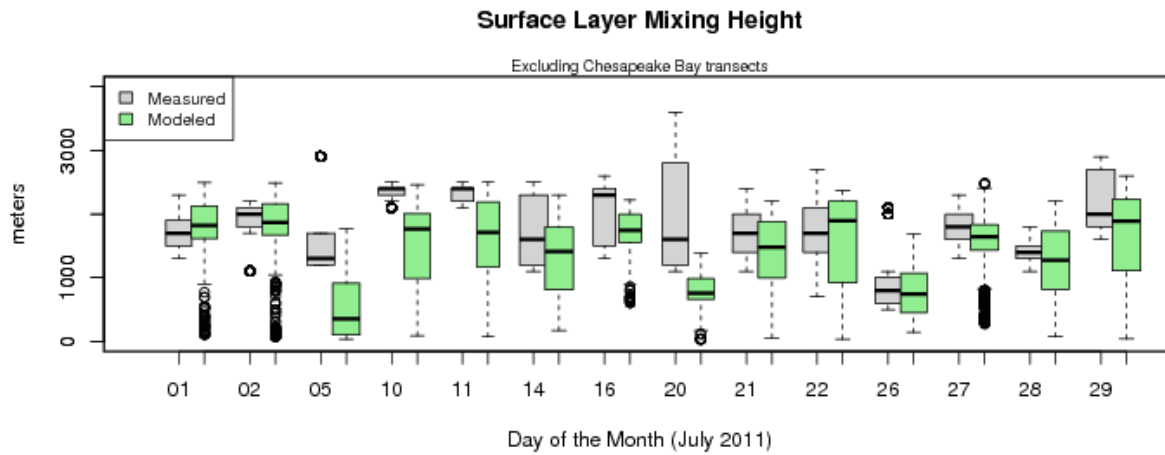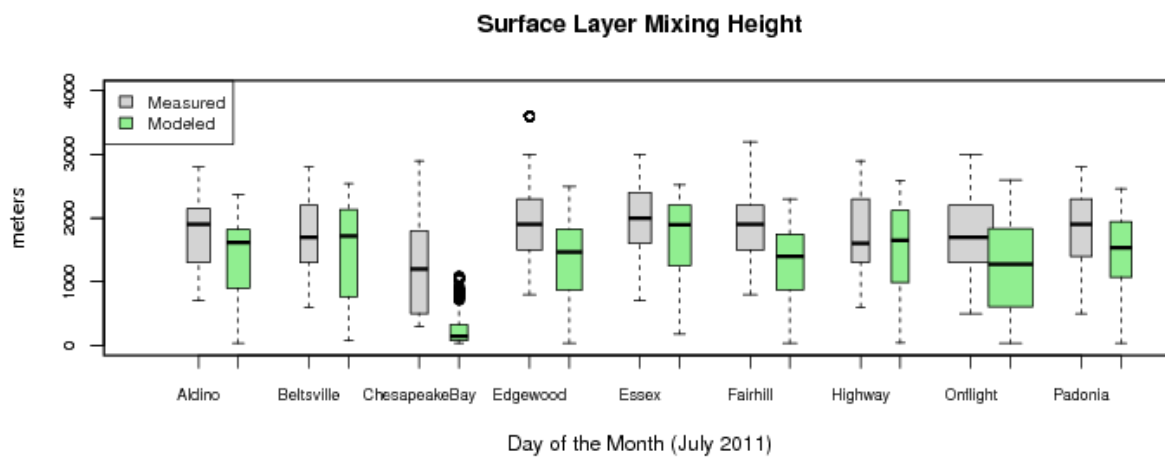

209

210 **Figure S17: Modeled and measured mixed layer heights by flight day and location.**

211

212 **Section S4: O3, CO, and NO2 modeled source contributions**

213 Figure S18 shows the distribution of sector contribution to model estimated O3, CO, and NO2 at times and  
 214 locations that match aircraft measurements below 2 km in altitude. The largest contributing sectors to aircraft O3  
 215 include fairly similar amounts from biogenics, EGUs (local to regional), nonroad, onroad diesel, and onroad  
 216 gasoline sources. The largest contributions to modeled CO include fairly comparable amounts from onroad  
 217 gasoline and nonroad (gasoline) sources. For NO2, the largest contributing sectors include onroad gasoline,  
 218 onroad diesel, nonroad, and EGUs (local to regional) which represent a different mix than seen for either CO or  
 219 O3 for this area. If these sector contributions are similar for the ambient data then ratios of CO and NO2 or NOY  
 220 may not truly represent any specific sector at the time and locations of these aircraft measurements. Figures S19  
 221 and S20 show spatial maps of the July 2011 average contributions of each source category to CO and ozone  
 222 respectively.

223

224

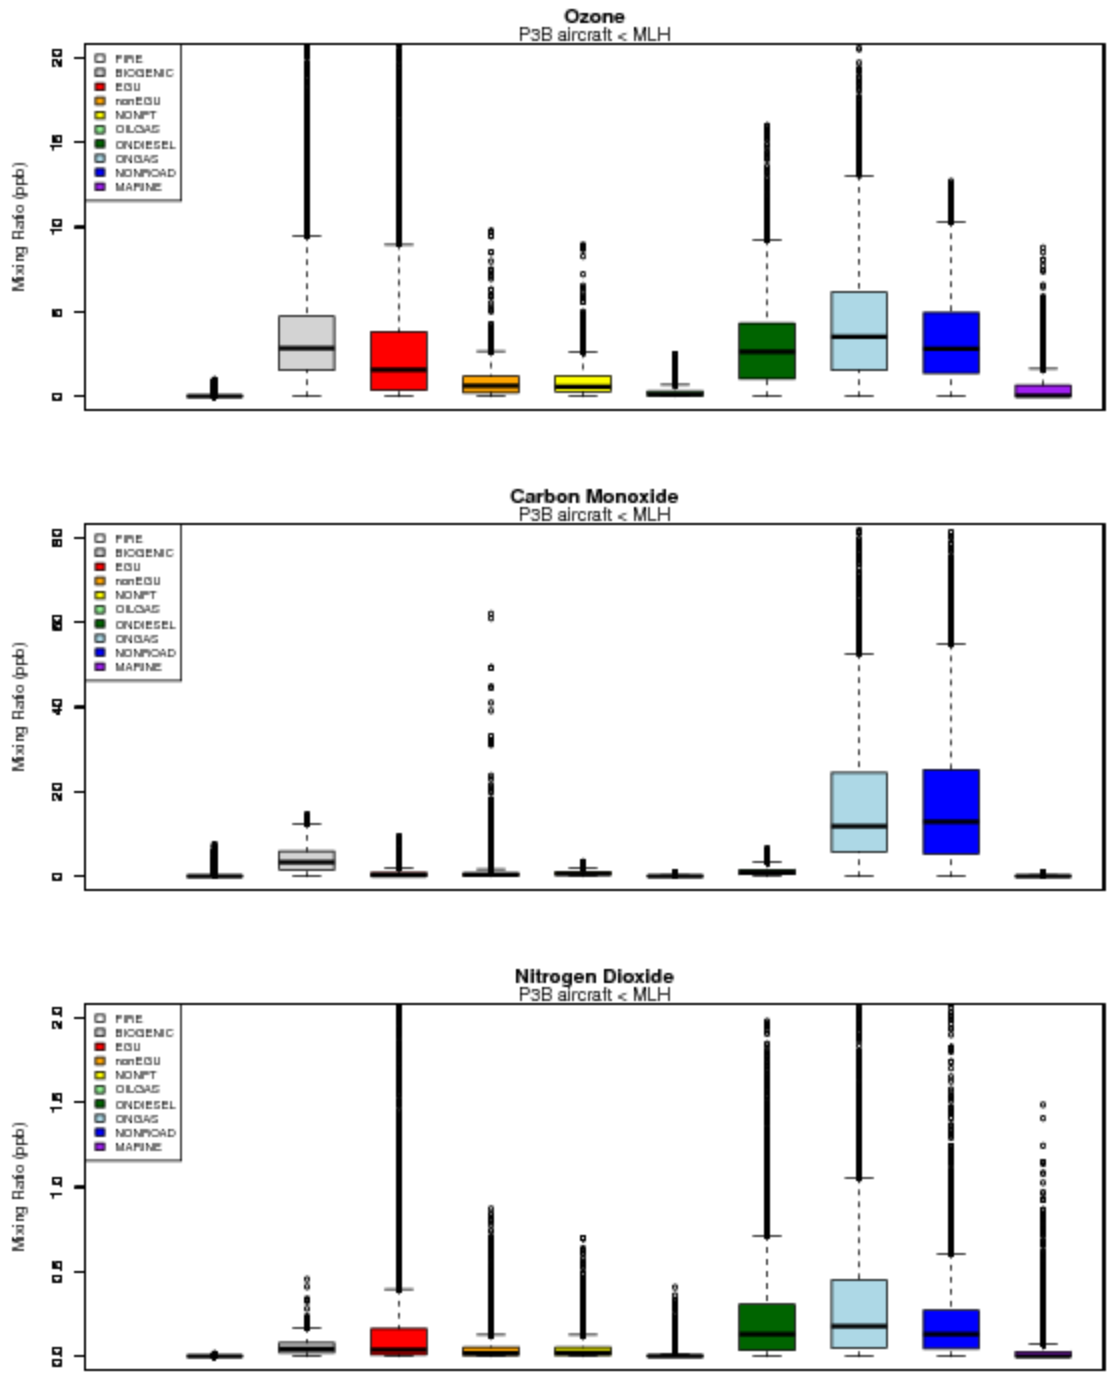

225

226 **Figure S18: Distribution of modeled O3 (top), CO (middle) and NO2 (bottom) mixing ratio contributions**  
 227 **within the boundary layer from each source category.**

228

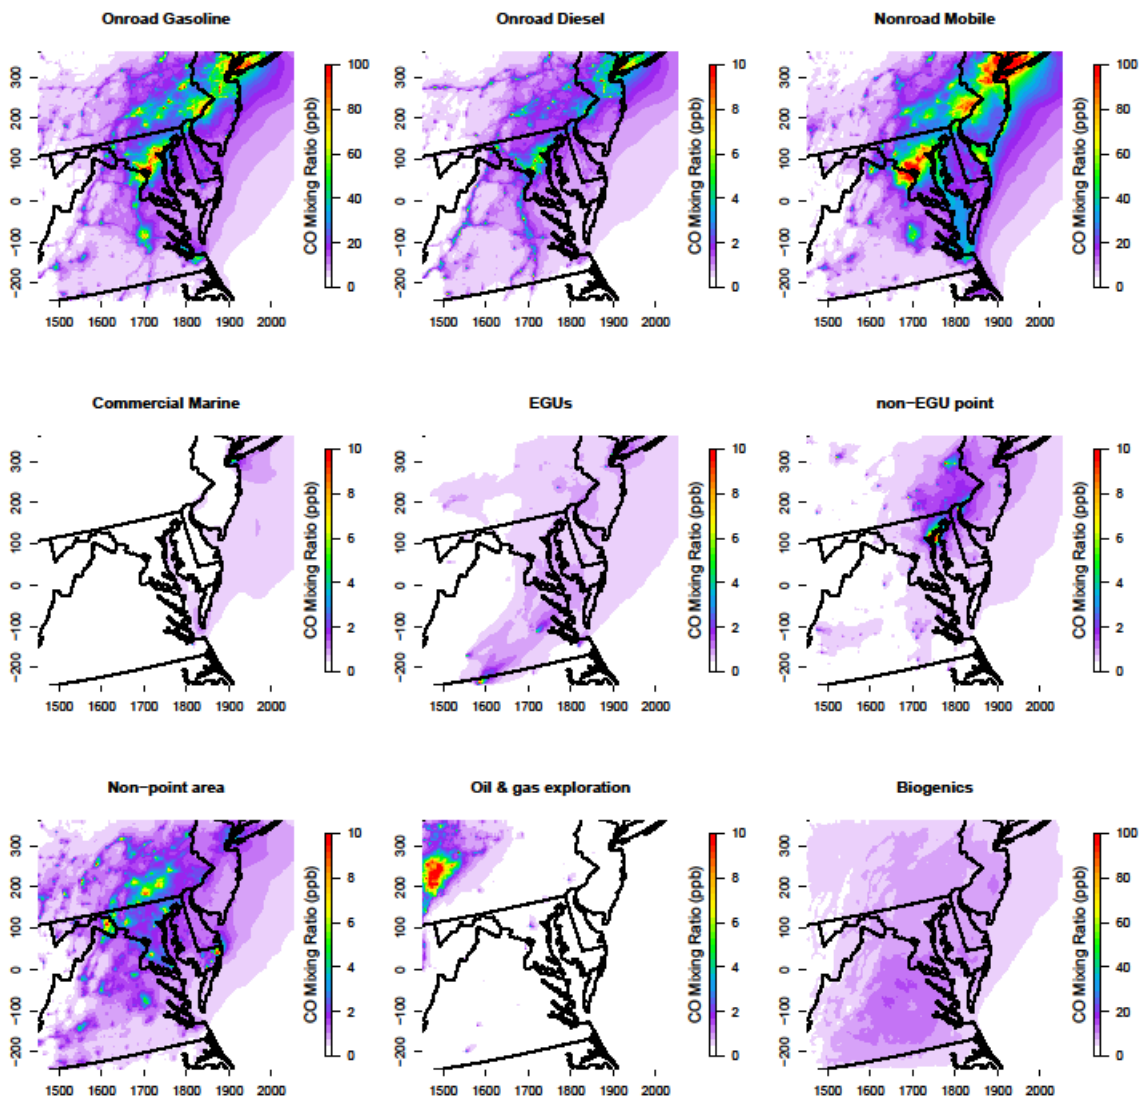

229

230 **Figure S19: Average July 2011 spatial plots of contributions to CO from different source tags.**

231

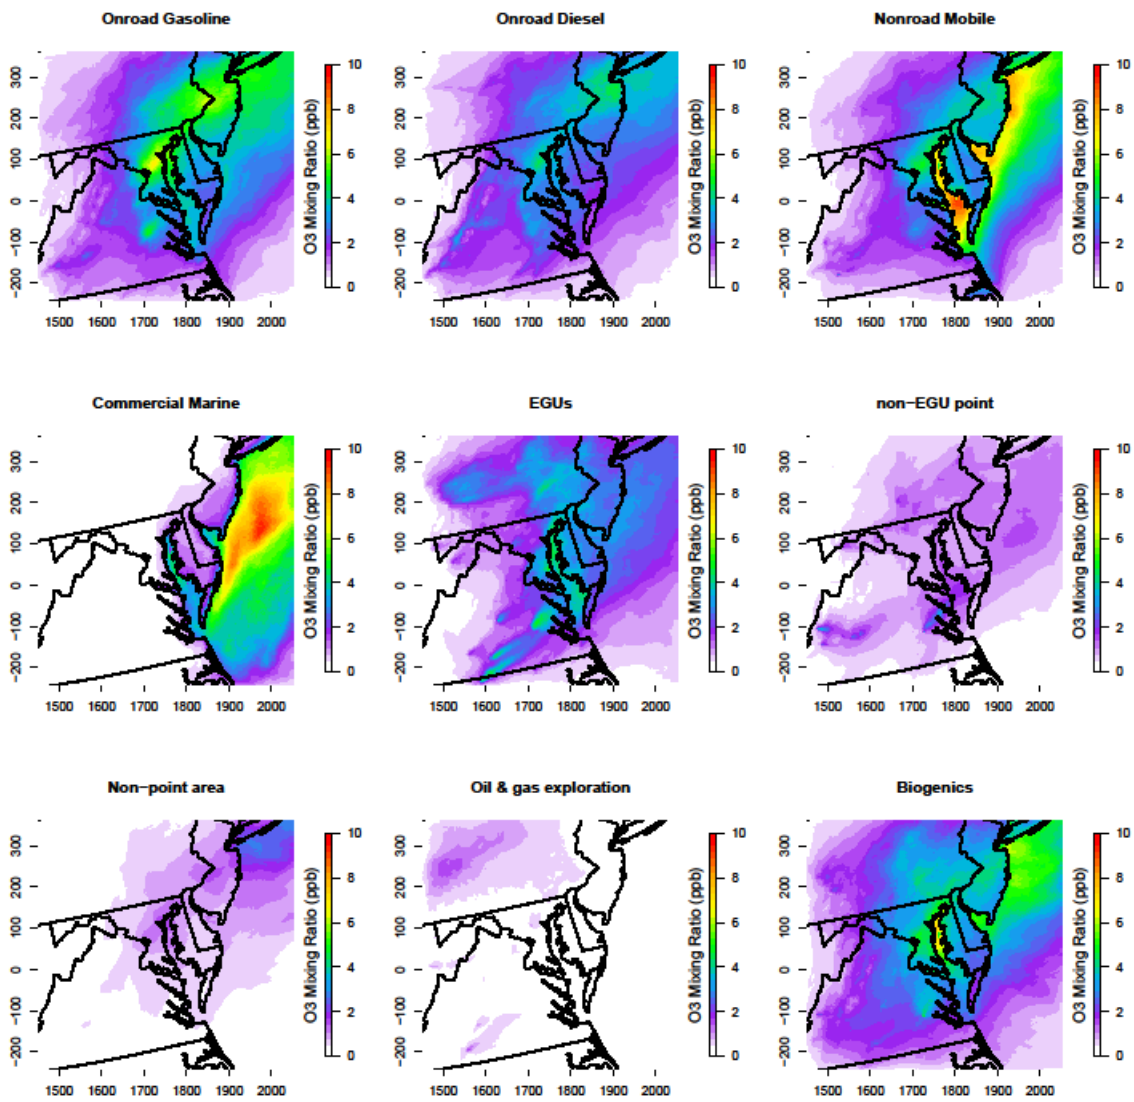

232

233 **Figures S20: Average July 2011 spatial plots of contributions to ozone from different source tags.**

234

235

236

237

238

239

240

241

242



243 Section S5:  $\Delta\text{CO}:\Delta\text{NO}_y$  ratios from all ambient and modeled regressions

244 Table S2.  $\Delta\text{CO}:\Delta\text{NO}_y$  ratios calculated using measured  $\text{NO}_y$  (navy),  $\sum\text{NO}_y,i$  (blue), and modeled  $\text{NO}_y$   
 245 (pink) for each flight day in July and each location identified in Figure 1 for data collected in the boundary  
 246 layer. Values derived from regressions that had Insignificant slopes are not shown. NA indicates no data  
 247 available for regression on this flight day for this location. Gray shading highlights flight days and  
 248 locations for which at least one regression was unavailable or had an insignificant slope. Orange shading  
 249 highlights flight days and locations for which the 95% confidence intervals (2 times standard error) for  
 250  $\Delta\text{CO}:\Delta\text{NO}_y$  from  $\text{NO}_y$  and  $\sum\text{NO}_y,i$  did not overlap.

|      | Aldino | Beltsville | Chesapeake Bay | Edgewood | Essex | Fairhill | Highway | Onflight | Padonia |
|------|--------|------------|----------------|----------|-------|----------|---------|----------|---------|
| 7/1  | 2.5    | 2.8        | 7.4            | 1.3      | 4.7   | 3.5      | 4.1     | 4.1      | 2.0     |
|      | 2.5    | 3.0        | 9.0            | 3.2      | 6.1   | 5.1      | 5.4     | 3.1      | Insig   |
|      | 5.2    | 8.1        | 9.5            | 5.9      | 9.8   | 11.1     | 10.5    | 9.7      | 9.3     |
| 7/2  | 12.3   | 9.1        | 10.0           | 9.1      | 3.9   | 10.3     | 5.0     | 7.5      | 8.3     |
|      | 13.4   | 11.4       | Insig          | 10.2     | 3.2   | 9.7      | 10.4    | 8.9      | 6.9     |
|      | 15.0   | 8.7        | 15.4           | 10.9     | 5.6   | 12.0     | 8.2     | 10.9     | 13.3    |
| 7/5  | 2.3    | 4.4        | 11.0           | 5.1      | 4.9   | 5.4      | 4.6     | 4.7      | 4.5     |
|      | 3.8    | 5.7        | 23.0           | 8.0      | 7.2   | 6.2      | 4.6     | 6.3      | NA      |
|      | 10.5   | 6.7        | Insig          | 9.1      | 8.9   | 8.6      | 10.1    | 7.5      | 9.2     |
| 7/10 | 33.1   | 39.0       | Insig          | 20.9     | 26.1  | 15.8     | 6.9     | 13.9     | 20.4    |
|      | 20.7   | 12.9       | 3.8            | 18.0     | 14.0  | 17.5     | 4.9     | 8.7      | 13.6    |
|      | 13.4   | 14.5       | 13.9           | 12.5     | 14.6  | 11.0     | 7.3     | 12.6     | 12.6    |
| 7/11 | 38.4   | 17.3       | Insig          | 26.8     | 23.9  | 32.1     | 10.0    | 18.8     | 38.1    |
|      | 14.5   | Insig      | Insig          | 14.1     | Insig | 19.5     | Insig   | 6.7      | 19.8    |
|      | 15.2   | 11.2       | Insig          | 13.0     | 15.6  | 17.5     | 9.9     | 13.8     | 26.4    |
| 7/14 | 12.7   | 7.2        | 21.3           | 10.8     | 10.0  | 12.1     | 3.4     | 4.7      | 8.9     |
|      | 6.5    | 4.4        | Insig          | 6.7      | 4.9   | 8.3      | 2.8     | 4.8      | Insig   |
|      | 10.9   | 9.2        | -12.5          | 11.8     | 9.1   | 10.6     | 10.2    | 10.4     | 11.5    |
| 7/16 | 11.9   | 7.6        | Insig          | 7.8      | 18.4  | 14.7     | 5.1     | 7.3      | 11.2    |
|      | 11.9   | 8.1        | Insig          | 8.5      | 14.8  | 14.2     | 8.3     | 9.2      | 10.6    |
|      | 10.4   | 10.9       | 14.7           | 8.7      | 8.7   | 9.4      | 9.3     | 11.7     | 13.8    |
| 7/20 | 6.7    | 5.9        | 30.3           | 14.7     | 7.4   | 11.7     | 2.6     | 5.9      | 13.2    |
|      | 5.7    | 8.8        | 22.3           | 16.0     | 8.3   | 13.7     | 3.8     | 4.5      | 11.0    |
|      | 10.3   | 12.8       | 3.8            | 2.8      | 9.3   | 13.3     | 11.4    | 9.1      | 13.7    |
| 7/21 | 17.9   | 9.7        | NA             | 4.8      | 12.2  | 21.6     | 9.0     | 7.7      | 21.2    |
|      | 16.3   | 9.8        | NA             | Insig    | 7.9   | 10.1     | 6.2     | 9.0      | 20.9    |
|      | 9.6    | Insig      | NA             | 5.7      | 5.5   | 8.6      | 4.0     | 6.4      | 12.9    |
| 7/22 | 25.4   | 7.8        | 9.0            | 5.1      | 24.9  | 28.0     | 7.3     | 5.6      | 24.2    |
|      | 19.9   | 6.5        | 8.5            | 2.7      | 22.9  | 21.0     | 5.6     | 2.2      | 23.1    |
|      | 17.6   | Insig      | 3.6            | 7.6      | 13.9  | 7.1      | 6.3     | 4.7      | 17.5    |
| 7/26 | 15.7   | 3.0        | 3.47           | 8.3      | 7.2   | 11.2     | 4.7     | 3.5      | 10.0    |
|      | 20.3   | Insig      | 2.1            | 6.5      | 6.1   | 8.6      | 3.2     | 1.5      | 11.7    |
|      | 10.4   | 10.5       | 10.0           | 10.7     | 10.3  | 7.2      | 10.2    | 9.1      | 5.8     |
| 7/27 | 12.1   | 8.7        | NA             | 9.1      | 7.9   | 12.3     | 3.5     | 10.6     | 9.2     |
|      | 7.4    | Insig      | NA             | Insig    | Insig | 7.9      | Insig   | 10.6     | Insig   |
|      | 10.0   | 9.8        | NA             | 6.4      | 7.4   | 11.6     | 10.2    | 7.6      | 4.6     |
| 7/28 | 17.5   | 3.7        | -43.1          | 7.5      | 8.3   | 13.5     | 4.3     | 5.6      | 8.2     |
|      | Insig  | Insig      | NA             | Insig    | NA    | 15.7     | 4.5     | Insig    | Insig   |
|      | 10.3   | 12.7       | 13.1           | 6.8      | 12.3  | 8.3      | 7.6     | 10.5     | 12.3    |
| 7/29 | 27.2   | 11.5       | 43.6           | 23.5     | 16.9  | 30.9     | 12.1    | 11.5     | 28.6    |
|      | 21.9   | 13.1       | 15.8           | 12.0     | 10.4  | 18.3     | 3.6     | 9.1      | 16.9    |
|      | 14.3   | 7.9        | 12.8           | 11.2     | 6.3   | 12.5     | 2.1     | 12.7     | 9.4     |

July, 02 2011 P3B flight

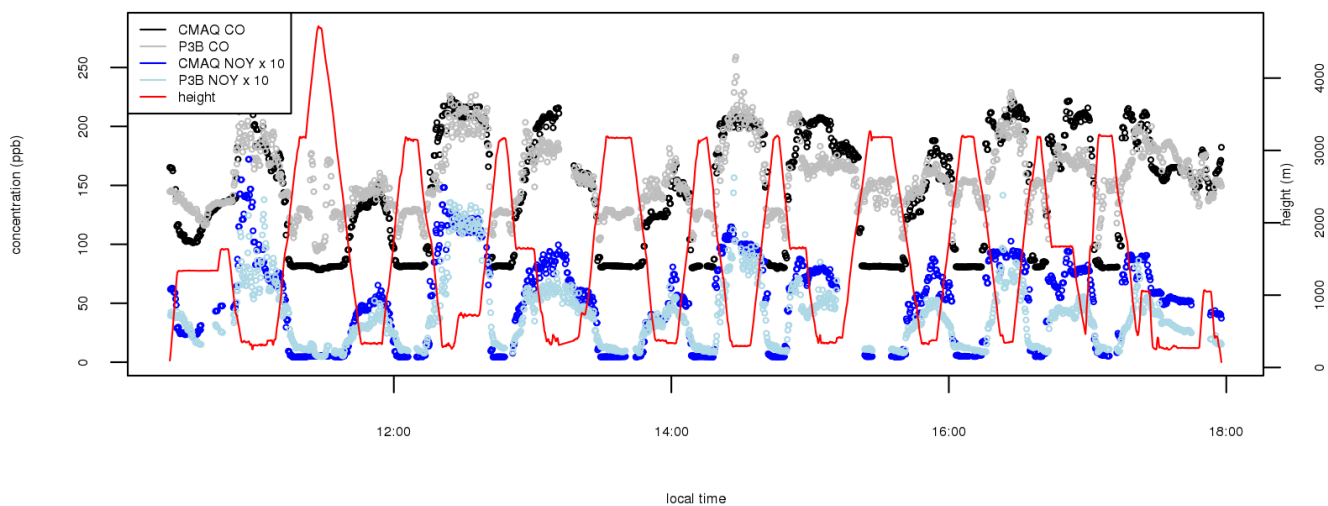

251  
252  
253

**Figure S21: Time series of observed and modeled CO and NO<sub>y</sub> matched in space and time along the aircraft flight track for July 2, 2011. Aircraft altitude is shown in red on the secondary y-axis.**

July, 22 2011 P3B flight

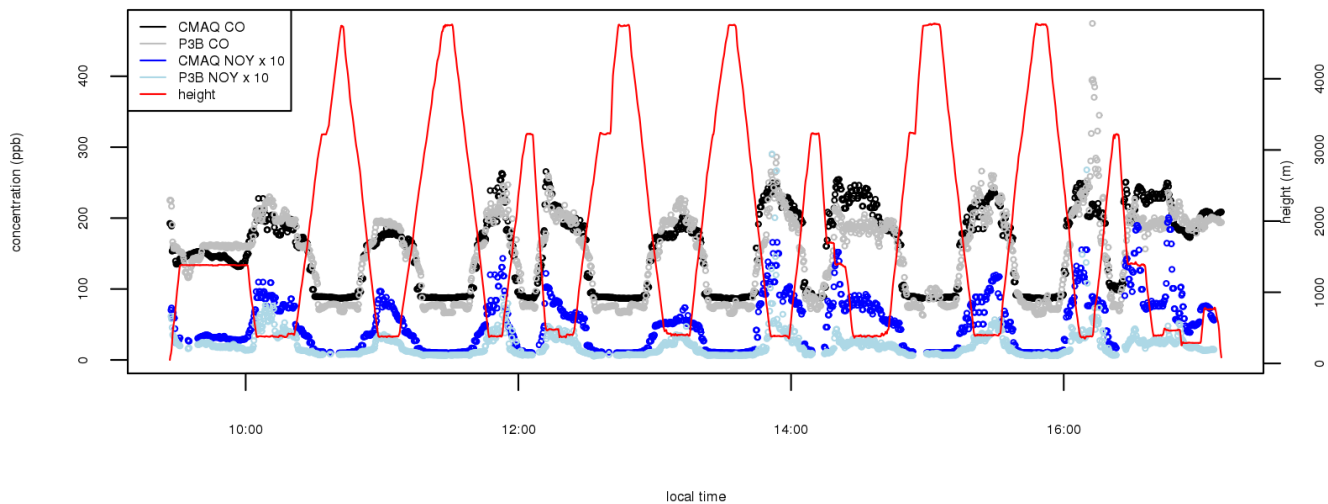

254

**Figure S22: Time series of observed and modeled CO and NO<sub>y</sub> matched in space and time along the aircraft flight track for July 22, 2011. Aircraft altitude is shown in red on the secondary y-axis.**

July, 27 2011 P3B flight

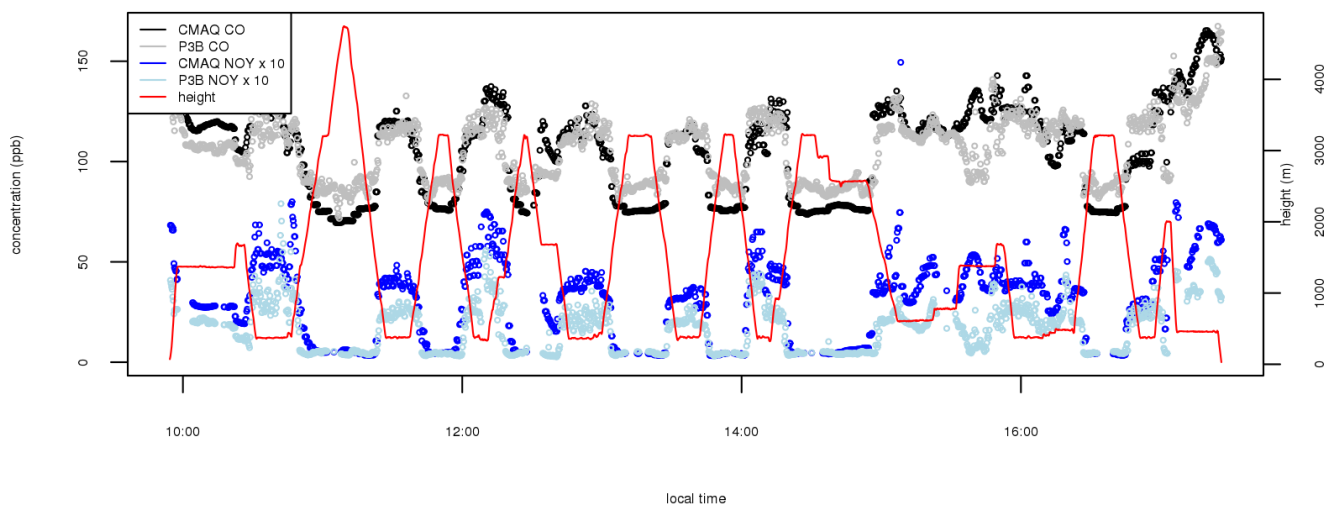

257

258 **Figure S23: time series of observed and modeled CO and NO<sub>y</sub> matched in space and time along the aircraft**  
259 **flight track for July 27, 2011. Aircraft altitude is shown in red on the secondary y-axis.**

260

261

262

263

264

265

266

267

268

269

270

271

272

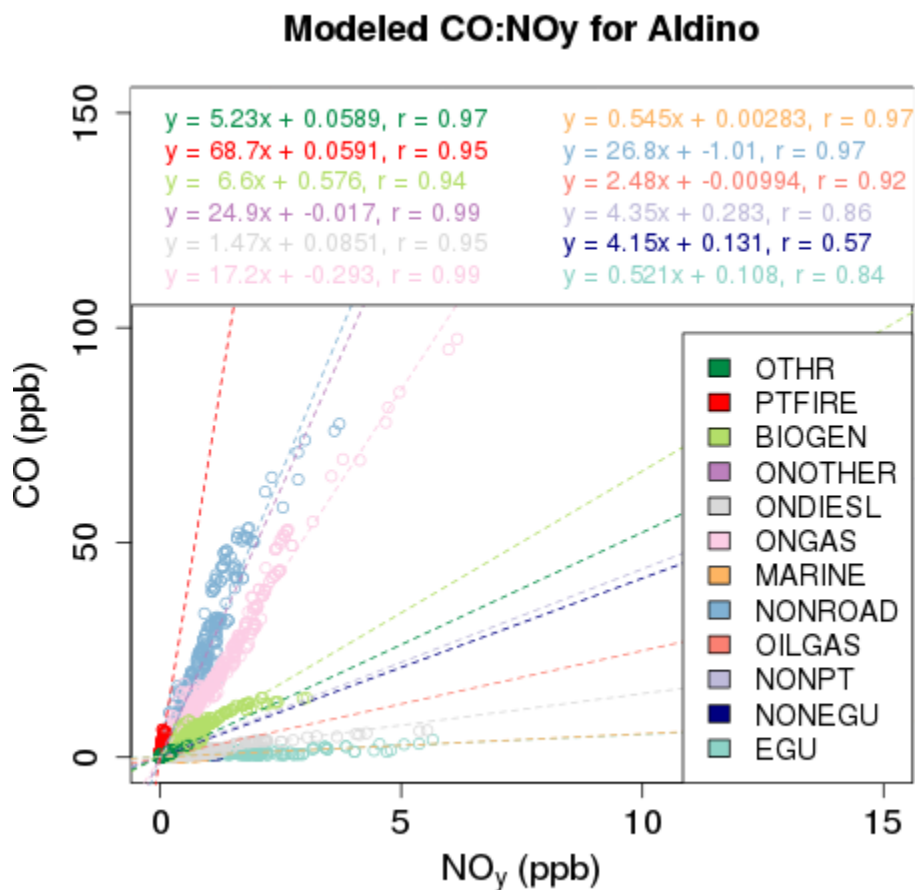

274

275 **Figure S24: CO:NO<sub>y</sub> regressions for specific modeled source categories for Aldino. Source tag**  
 276 **abbreviations defined in Table 1.**
